# Supplementary material for: Retracted: Overexpression of Bacterial mtlD Gene in Peanut Improves Drought Tolerance through Accumulation of Mannitol
Source: ScientificWorldJournal. 2019 Dec 13;2019:2434085. doi: 10.1155/2019/2434085 (PMC6930757; doi:10.1155/2019/2434085)
Supplement: Supplementary Materials — The authors responded and provided some of the original figures and data, which are included as supplementary materials. [file 2434085.f1.xlsx]

## Sheet: Dehydration
Dehydration Studies of MTLD Of T1 Transgenic Groundnut Plants
				Hours (hrs)									Calculations
Sr. No	Plant No	Line No	Fresh wt	1	2	3	4	5	6	7	8		1	2	3	4	5	6	7	8
1	1	MTD-1-32	0.48	0.37	0.33	0.3	0.27	0.26	0.24	0.23	0.21		22.9167	31.25	37.5	43.75	45.8333	50	52.0833	56.25
2	2	MTD-1-33	0.44	0.34	0.33	0.28	0.28	0.24	0.24	0.24	0.22		22.7273	25	36.3636	36.3636	45.4545	45.4545	45.4545	50
3	3	MTD-1-34	0.28	0.19	0.16	0.15	0.14	0.13	0.12	0.12	0.11		32.1429	42.8571	46.4286	50	53.5714	57.1429	57.1429	60.7143
4	4	MTD-1-35	0.42	0.31	0.26	0.26	0.24	0.22	0.21	0.2	0.19		26.1905	38.0952	38.0952	42.8571	47.619	50	52.381	54.7619
5	5	MTD-1-36	0.61	0.38	0.37	0.33	0.32	0.31	0.27	0.27	0.24		37.7049	39.3443	45.9016	47.541	49.1803	55.7377	55.7377	60.6557
6	6	MTD-1-37	0.33	0.21	0.19	0.18	0.18	0.17	0.14	0.14	0.14		36.3636	42.4242	45.4545	45.4545	48.4848	57.5758	57.5758	57.5758
7	7	MTD-1-38	0.56	0.36	0.31	0.29	0.27	0.27	0.2	0.2	0.2		35.7143	44.6429	48.2143	51.7857	51.7857	64.2857	64.2857	64.2857
8	8	MTD-1-39	0.2	0.19	0.18	0.18	0.14	0.14	0.13	0.13	0.11		5	10	10	30	30	35	35	45
9	9	MTD-1-40	0.44	0.29	0.26	0.26	0.23	0.21	0.18	0.14	0.14		34.0909	40.9091	40.9091	47.7273	52.2727	59.0909	68.1818	68.1818
10	10	MTD-1-41	0.42	0.29	0.26	0.23	0.23	0.23	0.22	0.19	0.19		30.9524	38.0952	45.2381	45.2381	45.2381	47.619	54.7619	54.7619
11	11	MTD-1-42	0.33	0.24	0.23	0.23	0.19	0.17	0.16	0.15	0.13		27.2727	30.303	30.303	42.4242	48.4848	51.5152	54.5455	60.6061
12	12	MTD-1-43	0.39	0.28	0.26	0.25	0.24	0.24	0.21	0.28	0.17		28.2051	33.3333	35.8974	38.4615	38.4615	46.1538	28.2051	56.4103
13	13	MTD-1-44	0.57	0.37	0.31	0.31	0.27	0.27	0.24	0.23	0.23		35.0877	45.614	45.614	52.6316	52.6316	57.8947	59.6491	59.6491
14	14	MTD-1-45	0.6	0.35	0.29	0.28	0.27	0.25	0.22	0.21	0.2		41.6667	51.6667	53.3333	55	58.3333	63.3333	65	66.6667
15	15	MTD-1-46	0.63	0.39	0.36	0.32	0.31	0.3	0.25	0.24	0.21		38.0952	42.8571	49.2063	50.7937	52.381	60.3175	61.9048	66.6667
16	16	MTD-1-47	0.31	0.16	0.13	0.12	0.1	0.08	0.07	0.07	0.05		48.3871	58.0645	61.2903	67.7419	74.1935	77.4194	77.4194	83.871
17	17	MTD-1-48	0.49	0.3	0.29	0.25	0.24	0.23	0.21	0.21	0.2		38.7755	40.8163	48.9796	51.0204	53.0612	57.1429	57.1429	59.1837
18	18	MTD-1-49	0.43	0.25	0.22	0.21	0.21	0.21	0.18	0.15	0.15		41.8605	48.8372	51.1628	51.1628	51.1628	58.1395	65.1163	65.1163
19	19	MTD-1-50	0.73	0.48	0.42	0.39	0.39	0.34	0.32	0.314	0.31		34.2466	42.4658	46.5753	46.5753	53.4247	56.1644	56.9863	57.5342
20	20	MTD-1-51	0.3	0.18	0.17	0.14	0.14	0.12	0.11	0.12	0.1		40	43.3333	53.3333	53.3333	60	63.3333	60	66.6667
21	21	MTD-1-52	0.45	0.33	0.29	0.29	0.29	0.23	0.23	0.22	0.18		26.6667	35.5556	35.5556	35.5556	48.8889	48.8889	51.1111	60
22	22	MTD-2-46	0.44	0.26	0.24	0.23	0.23	0.19	0.19	0.18	0.18		40.9091	45.4545	47.7273	47.7273	56.8182	56.8182	59.0909	59.0909
23	23	MTD-2-47	0.21	0.13	0.11	0.11	0.11	0.09	0.08	0.08	0.06		38.0952	47.619	47.619	47.619	57.1429	61.9048	61.9048	71.4286
24	24	MTD-2-48	0.39	0.3	0.26	0.26	0.26	0.22	0.2	0.19	0.19		23.0769	33.3333	33.3333	33.3333	43.5897	48.7179	51.2821	51.2821
25	25	MTD-2-49	0.33	0.23	0.21	0.18	0.18	0.15	0.14	0.13	0.11		30.303	36.3636	45.4545	45.4545	54.5455	57.5758	60.6061	66.6667
26	26	MTD-2-50	0.33	0.21	0.19	0.19	0.19	0.16	0.13	0.13	0.13		36.3636	42.4242	42.4242	42.4242	51.5152	60.6061	60.6061	60.6061
27	27	MTD-2-51	0.51	0.37	0.35	0.31	0.31	0.27	0.27	0.24	0.24		27.451	31.3725	39.2157	39.2157	47.0588	47.0588	52.9412	52.9412
28	28	MTD-2-52	0.4	0.28	0.25	0.24	0.24	0.23	0.23	0.2	0.2		30	37.5	40	40	42.5	42.5	50	50
29	29	MTD-2-53	0.45	0.3	0.29	0.26	0.236	0.23	0.22	0.2	0.19		33.3333	35.5556	42.2222	47.5556	48.8889	51.1111	55.5556	57.7778
30	30	MTD-2-54	0.47	0.34	0.31	0.23	0.23	0.27	0.2	0.25	0.25		27.6596	34.0426	51.0638	51.0638	42.5532	57.4468	46.8085	46.8085
31	31	MTD-2-55	0.52	0.41	0.36	0.34	0.3	0.3	0.26	0.25	0.24		21.1538	30.7692	34.6154	42.3077	42.3077	50	51.9231	53.8462
32	32	MTD-2-56	0.48	0.33	0.31	0.29	0.27	0.25	0.23	0.23	0.21		31.25	35.4167	39.5833	43.75	47.9167	52.0833	52.0833	56.25
33	33	MTD-2-57	0.62	0.41	0.41	0.4	0.35	0.33	0.33	0.3	0.25		33.871	33.871	35.4839	43.5484	46.7742	46.7742	51.6129	59.6774
34	34	MTD-2-58	0.48	0.28	0.28	0.26	0.24	0.23	0.2	0.2	0.18		41.6667	41.6667	45.8333	50	52.0833	58.3333	58.3333	62.5
35	35	MTD-2-59	0.56	0.29	0.29	0.28	0.27	0.25	0.23	0.21	0.21		48.2143	48.2143	50	51.7857	55.3571	58.9286	62.5	62.5
36	36	MTD-2-60	0.6	0.37	0.34	0.32	0.29	0.29	0.28	0.26	0.24		38.3333	43.3333	46.6667	51.6667	51.6667	53.3333	56.6667	60
37	37	MTD-2-61	0.41	0.28	0.22	0.18	0.16	0.16	0.14	0.13	0.11		31.7073	46.3415	56.0976	60.9756	60.9756	65.8537	68.2927	73.1707
38	38	MTD-2-62	0.58	0.37	0.34	0.32	0.28	0.28	0.27	0.24	0.24		36.2069	41.3793	44.8276	51.7241	51.7241	53.4483	58.6207	58.6207
39	39	MTD-2-63	0.5	0.31	0.26	0.26	0.24	0.24	0.21	0.19	0.18		38	48	48	52	52	58	62	64
40	40	MTD-2-64	0.77	0.48	0.42	0.4	0.38	0.35	0.35	0.34	0.31		37.6623	45.4545	48.0519	50.6494	54.5455	54.5455	55.8442	59.7403
41	41	MTD-2-65	0.53	0.38	0.34	0.31	0.29	0.29	0.27	0.24	0.23		28.3019	35.8491	41.5094	45.283	45.283	49.0566	54.717	56.6038
42	42	MTD-2-66	0.82	0.57	0.52	0.48	0.45	0.41	0.4	0.36	0.36		30.4878	36.5854	41.4634	45.122	50	51.2195	56.0976	56.0976
43	43	MTD-2-67	0.3	0.22	0.19	0.19	0.18	0.17	0.16	0.16	0.16		26.6667	36.6667	36.6667	40	43.3333	46.6667	46.6667	46.6667
44	44	MTD-2-68	0.49	0.32	0.27	0.26	0.24	0.23	0.21	0.2	0.19		34.6939	44.898	46.9388	51.0204	53.0612	57.1429	59.1837	61.2245
45	45	MTD-2-69	0.74	0.44	0.37	0.35	0.34	0.31	0.27	0.26	0.22		40.5405	50	52.7027	54.0541	58.1081	63.5135	64.8649	70.2703
46	46	MTD-2-70	0.19	0.13	0.1	0.07	0.06	0.06	0.06	0.06	0.05		31.5789	47.3684	63.1579	68.4211	68.4211	68.4211	68.4211	73.6842
47	47	MTD-3-4											#DIV/0!	#DIV/0!	#DIV/0!	#DIV/0!	#DIV/0!	#DIV/0!	#DIV/0!	#DIV/0!
48	48	MTD-3-5											#DIV/0!	#DIV/0!	#DIV/0!	#DIV/0!	#DIV/0!	#DIV/0!	#DIV/0!	#DIV/0!
49	49	MTD-3-6	0.44	0.16	0.23	0.23	0.21	0.19	0.18	0.16	0.16		63.6364	47.7273	47.7273	52.2727	56.8182	59.0909	63.6364	63.6364
50	50	MTD-3-7	0.41	0.27	0.26	0.24	0.22	0.22	0.2	0.19	0.19		34.1463	36.5854	41.4634	46.3415	46.3415	51.2195	53.6585	53.6585
51	51	MTD-3-8	0.6	0.41	0.34	0.34	0.33	0.32	0.31	0.29	0.29		31.6667	43.3333	43.3333	45	46.6667	48.3333	51.6667	51.6667
52	52	MTD-3-9	0.53	0.37	0.34	0.3	0.3	0.27	0.25	0.24	0.24		30.1887	35.8491	43.3962	43.3962	49.0566	52.8302	54.717	54.717
53	53	MTD-3-10	0.33	0.24	0.22	0.2	0.18	0.17	0.16	0.15	0.13		27.2727	33.3333	39.3939	45.4545	48.4848	51.5152	54.5455	60.6061
54	54	MTD-3-11	0.4	0.26	0.24	0.21	0.2	0.18	0.14	0.14	0.12		35	40	47.5	50	55	65	65	70
55	55	MTD-3-12	0.49	0.24	0.2	0.2	0.19	0.18	0.15	0.15	0.15		51.0204	59.1837	59.1837	61.2245	63.2653	69.3878	69.3878	69.3878
56	56	MTD-3-13	0.41	0.32	0.29	0.27	0.24	0.22	0.21	0.19	0.18		21.9512	29.2683	34.1463	41.4634	46.3415	48.7805	53.6585	56.0976
57	57	MTD-3-14	0.46	0.35	0.31	0.29	0.28	0.27	0.26	0.22	0.22		23.913	32.6087	36.9565	39.1304	41.3043	43.4783	52.1739	52.1739
58	58	MTD-3-15	0.33	0.2	0.2	0.17	0.16	0.18	0.14	0.11	0.11		39.3939	39.3939	48.4848	51.5152	45.4545	57.5758	66.6667	66.6667
59	59	MTD-3-16	0.32	0.21	0.2	0.19	0.2	0.15	0.15	0.15	0.15		34.375	37.5	40.625	37.5	53.125	53.125	53.125	53.125
60	60	MTD-3-17	0.44	0.3	0.27	0.25	0.25	0.19	0.19	0.19	0.19		31.8182	38.6364	43.1818	43.1818	56.8182	56.8182	56.8182	56.8182
61	61	MTD-3-18	0.42	0.25	0.24	0.22	0.22	0.18	0.18	0.18	0.17		40.4762	42.8571	47.619	47.619	57.1429	57.1429	57.1429	59.5238
62	62	MTD-3-19	0.39	0.3	0.28	0.25	0.24	0.22	0.2	0.2	0.17		23.0769	28.2051	35.8974	38.4615	43.5897	48.7179	48.7179	56.4103
63	63	MTD-3-20	0.58	0.35	0.31	0.29	0.27	0.25	0.22	0.21	0.21		39.6552	46.5517	50	53.4483	56.8966	62.069	63.7931	63.7931
64	64	MTD-3-21	0.53	0.36	0.33	0.3	0.3	0.28	0.28	0.26	0.24		32.0755	37.7358	43.3962	43.3962	47.1698	47.1698	50.9434	54.717
65	65	MTD-3-22	0.47	0.31	0.27	0.24	0.24	0.22	0.21	0.18	0.18		34.0426	42.5532	48.9362	48.9362	53.1915	55.3191	61.7021	61.7021
66	66	MTD-3-23	0.32	0.23	0.2	0.19	0.19	0.17	0.17	0.16	0.16		28.125	37.5	40.625	40.625	46.875	46.875	50	50
67	67	MTD-3-24	0.35	0.24	0.22	0.2	0.18	0.17	0.17	0.14	0.14		31.4286	37.1429	42.8571	48.5714	51.4286	51.4286	60	60
68	68	MTD-3-25	0.27	0.21	0.16	0.14	0.13	0.13	0.12	0.11	0.11		22.2222	40.7407	48.1481	51.8519	51.8519	55.5556	59.2593	59.2593
69	69	MTD-3-26	0.52	0.38	0.33	0.3	0.27	0.26	0.25	0.24	0.24		26.9231	36.5385	42.3077	48.0769	50	51.9231	53.8462	53.8462
70	70	MTD-3-27	0.48	0.35	0.31	0.28	0.27	0.26	0.24	0.23	0.2		27.0833	35.4167	41.6667	43.75	45.8333	50	52.0833	58.3333
71	71	MTD-3-28	0.35	0.23	0.22	0.19	0.18	0.17	0.16	0.15	0.13		34.2857	37.1429	45.7143	48.5714	51.4286	54.2857	57.1429	62.8571
72	72	MTD-3-29	0.24	0.17	0.14	0.11	0.1	0.09	0.09	0.09	0.06		29.1667	41.6667	54.1667	58.3333	62.5	62.5	62.5	75
73	73	MTD-3-30	0.66	0.51	0.48	0.44	0.41	0.4	0.38	0.37	0.37		22.7273	27.2727	33.3333	37.8788	39.3939	42.4242	43.9394	43.9394
74	74	MTD-3-31	1	0.78	0.67	0.6	0.57	0.52	0.5	0.47	0.47		22	33	40	43	48	50	53	53
75	75	MTD-3-32	0.52	0.37	0.34	0.31	0.29	0.29	0.24	0.24	0.24		28.8462	34.6154	40.3846	44.2308	44.2308	53.8462	53.8462	53.8462
76	76	MTD-3-33	0.53	0.43	0.39	0.36	0.35	0.32	0.32	0.32	0.28		18.8679	26.4151	32.0755	33.9623	39.6226	39.6226	39.6226	47.1698
77	77	MTD-3-34	0.71	0.5	0.45	0.4	0.35	0.31	0.3	0.29	0.25		29.5775	36.6197	43.662	50.7042	56.338	57.7465	59.1549	64.7887
78	78	MTD-3-35	0.41	0.3	0.29	0.26	0.22	0.2	0.18	0.17	0.15		26.8293	29.2683	36.5854	46.3415	51.2195	56.0976	58.5366	63.4146
79	79	MTD-3-36											#DIV/0!	#DIV/0!	#DIV/0!	#DIV/0!	#DIV/0!	#DIV/0!	#DIV/0!	#DIV/0!
80	80	MTD-3-37	0.51	0.39	0.37	0.33	0.31	0.3	0.26	0.25	0.23		23.5294	27.451	35.2941	39.2157	41.1765	49.0196	50.9804	54.902
81	81	MTD-3-38	0.44	0.33	0.29	0.29	0.27	0.25	0.24	0.22	0.22		25	34.0909	34.0909	38.6364	43.1818	45.4545	50	50
82	82	MTD-3-39	0.4	0.31	0.29	0.27	0.26	0.25	0.23	0.21	0.21		22.5	27.5	32.5	35	37.5	42.5	47.5	47.5
83	83	MTD-3-40	0.29	0.21	0.18	0.15	0.13	0.12	0.11	0.09	0.09		27.5862	37.931	48.2759	55.1724	58.6207	62.069	68.9655	68.9655
84	84	MTD-3-41	0.45	0.31	0.28	0.25	0.23	0.19	0.18	0.17	0.14		31.1111	37.7778	44.4444	48.8889	57.7778	60	62.2222	68.8889
85	85	MTD-3-42	0.33	0.28	0.25	0.23	0.21	0.2	0.19	0.19	0.18		15.1515	24.2424	30.303	36.3636	39.3939	42.4242	42.4242	45.4545
86	86	MTD-3-43	0.62	0.46	0.43	0.41	0.39	0.36	0.35	0.33	0.32		25.8065	30.6452	33.871	37.0968	41.9355	43.5484	46.7742	48.3871
87	87	MTD-3-44	0.48	0.33	0.31	0.29	0.26	0.23	0.23	0.21	0.2		31.25	35.4167	39.5833	45.8333	52.0833	52.0833	56.25	58.3333
88	88	MTD-3-45	0.31	0.24	0.21	0.2	0.18	0.18	0.17	0.14	0.1		22.5806	32.2581	35.4839	41.9355	41.9355	45.1613	54.8387	67.7419
89	89	MTD-3-46	0.33	0.25	0.22	0.22	0.21	0.18	0.18	0.18	0.152		24.2424	33.3333	33.3333	36.3636	45.4545	45.4545	45.4545	53.9394
90	90	MTD-3-47	0.44	0.3	0.27	0.26	0.23	0.21	0.2	0.19	0.19		31.8182	38.6364	40.9091	47.7273	52.2727	54.5455	56.8182	56.8182
91	91	MTD-3-48	0.21	0.19	0.15	0.12	0.11	0.1	0.08	0.08	0.08		9.52381	28.5714	42.8571	47.619	52.381	61.9048	61.9048	61.9048
92	92	MTD-3-49	0.34	0.24	0.22	0.19	0.17	0.17	0.16	0.14	0.14		29.4118	35.2941	44.1176	50	50	52.9412	58.8235	58.8235
93	93	MTD-3-50	0.33	0.23	0.23	0.21	0.18	0.17	0.16	0.11	0.11		30.303	30.303	36.3636	45.4545	48.4848	51.5152	66.6667	66.6667
94	94	MTD-3-51	0.45	0.37	0.36	0.34	0.33	0.3	0.29	0.29	0.29		17.7778	20	24.4444	26.6667	33.3333	35.5556	35.5556	35.5556
95	95	MTD-3-52	0.36	0.29	0.27	0.25	0.24	0.24	0.23	0.21	0.2		19.4444	25	30.5556	33.3333	33.3333	36.1111	41.6667	44.4444
96	96	MTD-3-53	0.43	0.34	0.32	0.29	0.27	0.21	0.2	0.2	0.2		20.9302	25.5814	32.5581	37.2093	51.1628	53.4884	53.4884	53.4884
97	97	MTD-3-54	0.41	0.26	0.24	0.23	0.21	0.21	0.2	0.2	0.19		36.5854	41.4634	43.9024	48.7805	48.7805	51.2195	51.2195	53.6585
98	98	MTD-3-55	0.47	0.35	0.32	0.3	0.28	0.28	0.24	0.23	0.21		25.5319	31.9149	36.1702	40.4255	40.4255	48.9362	51.0638	55.3191
99	99	MTD-3-56	0.53	0.4	0.37	0.36	0.33	0.32	0.3	0.24	0.24		24.5283	30.1887	32.0755	37.7358	39.6226	43.3962	54.717	54.717
100	100	MTD-3-57	0.56	0.44	0.4	0.39	0.35	0.33	0.29	0.29	0.28		21.4286	28.5714	30.3571	37.5	41.0714	48.2143	48.2143	50
101	101	MTD-3-58	0.26	0.22	0.17	0.15	0.14	0.12	0.12	0.11	0.1		15.3846	34.6154	42.3077	46.1538	53.8462	53.8462	57.6923	61.5385
102	102	MTD-3-59	0.44	0.33	0.3	0.28	0.24	0.21	0.19	0.18	0.17		25	31.8182	36.3636	45.4545	52.2727	56.8182	59.0909	61.3636
103	103	MTD-3-60	0.51	0.36	0.32	0.31	0.28	0.27	0.23	0.23	0.22		29.4118	37.2549	39.2157	45.098	47.0588	54.902	54.902	56.8627
104	104	MTD-3-61	0.37	0.28	0.24	0.23	0.2	0.19	0.17	0.15	0.14		24.3243	35.1351	37.8378	45.9459	48.6486	54.0541	59.4595	62.1622
105	105	MTD-4-3	0.4	0.38	0.33	0.25	0.23	0.2	0.2	0.19	0.16		5	17.5	37.5	42.5	50	50	52.5	60
106	106	MTD-4-4											#DIV/0!	#DIV/0!	#DIV/0!	#DIV/0!	#DIV/0!	#DIV/0!	#DIV/0!	#DIV/0!
107	107	MTD-4-5	0.48	0.36	0.29	0.29	0.28	0.24	0.24	0.22	0.22		25	39.5833	39.5833	41.6667	50	50	54.1667	54.1667
108	108	MTD-4-6	0.38	0.27	0.26	0.23	0.23	0.21	0.19	0.19	0.18		28.9474	31.5789	39.4737	39.4737	44.7368	50	50	52.6316
109	109	MTD-4-7	0.5	0.32	0.29	0.26	0.25	0.24	0.22	0.21	0.2		36	42	48	50	52	56	58	60
110	110	MTD-4-8											#DIV/0!	#DIV/0!	#DIV/0!	#DIV/0!	#DIV/0!	#DIV/0!	#DIV/0!	#DIV/0!
111	111	MTD-4-9	0.44	0.27	0.24	0.21	0.21	0.19	0.17	0.14	0.14		38.6364	45.4545	52.2727	52.2727	56.8182	61.3636	68.1818	68.1818
112	112	MTD-4-10											#DIV/0!	#DIV/0!	#DIV/0!	#DIV/0!	#DIV/0!	#DIV/0!	#DIV/0!	#DIV/0!
113	113	MTD-4-11	0.47	0.29	0.24	0.22	0.21	0.21	0.19	0.17	0.17		38.2979	48.9362	53.1915	55.3191	55.3191	59.5745	63.8298	63.8298
114	114	MTD-4-12	0.52	0.32	0.29	0.24	0.24	0.23	0.21	0.21	0.19		38.4615	44.2308	53.8462	53.8462	55.7692	59.6154	59.6154	63.4615
115	115	MTD-4-13	0.36	0.23	0.2	0.14	0.14	0.14	0.14	0.1	0.09		36.1111	44.4444	61.1111	61.1111	61.1111	61.1111	72.2222	75
116	116	MTD-4-14	0.61	0.37	0.34	0.27	0.25	0.25	0.24	0.2	0.2		39.3443	44.2623	55.7377	59.0164	59.0164	60.6557	67.2131	67.2131
117	117	MTD-4-15	0.27	0.25	0.18	0.17	0.14	0.14	0.14	0.1	0.09		7.40741	33.3333	37.037	48.1481	48.1481	48.1481	62.963	66.6667
118	118	MTD-4-16	0.43	0.27	0.27	0.27	0.24	0.23	0.19	0.21	0.18		37.2093	37.2093	37.2093	44.186	46.5116	55.814	51.1628	58.1395
119	119	MTD-4-17	0.46	0.33	0.28	0.27	0.27	0.27	0.19	0.23	0.2		28.2609	39.1304	41.3043	41.3043	41.3043	58.6957	50	56.5217
120	120	MTD-4-18	0.43	0.34	0.31	0.29	0.25	0.21	0.15	0.15	0.15		20.9302	27.907	32.5581	41.8605	51.1628	65.1163	65.1163	65.1163
121	121	MTD-4-19	0.35	0.24	0.22	0.22	0.19	0.19	0.17	0.17	0.14		31.4286	37.1429	37.1429	45.7143	45.7143	51.4286	51.4286	60
122	122	MTD-4-20	0.52	0.35	0.31	0.29	0.28	0.26	0.24	0.24	0.22		32.6923	40.3846	44.2308	46.1538	50	53.8462	53.8462	57.6923
123	123	MTD-4-21											#DIV/0!	#DIV/0!	#DIV/0!	#DIV/0!	#DIV/0!	#DIV/0!	#DIV/0!	#DIV/0!
124	124	MTD-4-22	0.58	0.39	0.36	0.34	0.33	.0.300	0.3	0.28	0.27		32.7586	37.931	41.3793	43.1034	#VALUE!	48.2759	51.7241	53.4483
125	125	MTD-4-23											#DIV/0!	#DIV/0!	#DIV/0!	#DIV/0!	#DIV/0!	#DIV/0!	#DIV/0!	#DIV/0!
126	126	MTD-5-6	0.37	0.26	0.24	0.22	0.21	0.21	0.21	0.21	0.17		29.7297	35.1351	40.5405	43.2432	43.2432	43.2432	43.2432	54.0541
127	127	MTD-5-7	0.54	0.4	0.36	0.36	0.35	0.31	0.31	0.3	0.27		25.9259	33.3333	33.3333	35.1852	42.5926	42.5926	44.4444	50
128	128	MTD-5-8	0.45	0.3	0.26	0.25	0.22	0.22	0.2	0.18	0.18		33.3333	42.2222	44.4444	51.1111	51.1111	55.5556	60	60
129	129	MTD-5-9	0.34	0.25	0.21	0.18	0.17	0.17	0.16	0.16	0.14		26.4706	38.2353	47.0588	50	50	52.9412	52.9412	58.8235
130	130	MTD-8-1	0.55	0.4	0.37	0.33	0.32	0.3	0.3	0.27	0.24		27.2727	32.7273	40	41.8182	45.4545	45.4545	50.9091	56.3636
131	131	MTD-6-1	0.37	0.26	0.23	0.22	0.2	0.18	0.18	0.15	0.15		29.7297	37.8378	40.5405	45.9459	51.3514	51.3514	59.4595	59.4595
132	132	MTD-6-2	0.41	0.28	0.26	0.23	0.22	0.2	0.18	0.17	0.14		31.7073	36.5854	43.9024	46.3415	51.2195	56.0976	58.5366	65.8537
133	133	MTD-7-5	0.65	0.15	0.46	0.45	0.43	0.41	0.39	0.36	0.36		76.9231	29.2308	30.7692	33.8462	36.9231	40	44.6154	44.6154
134	134	MTD-7-6											#DIV/0!	#DIV/0!	#DIV/0!	#DIV/0!	#DIV/0!	#DIV/0!	#DIV/0!	#DIV/0!
135	135	MTD-7-7											#DIV/0!	#DIV/0!	#DIV/0!	#DIV/0!	#DIV/0!	#DIV/0!	#DIV/0!	#DIV/0!
136	136	MTD-7-8	0.42	0.28	0.24	0.23	0.2	0.18	0.18	0.18	0.17		33.3333	42.8571	45.2381	52.381	57.1429	57.1429	57.1429	59.5238
137	137	MTD-7-9	0.3	0.3	0.26	0.22	0.22	0.2	0.19	0.19	0.19		0	13.3333	26.6667	26.6667	33.3333	36.6667	36.6667	36.6667
138	138	MTD-7-10	0.38	0.38	0.35	0.32	0.31	0.3	0.24	0.24	0.24		0	7.89474	15.7895	18.4211	21.0526	36.8421	36.8421	36.8421
139	139	MTD-7-11	0.27	0.19	0.14	0.12	0.09	0.09	0.09	0.08	0.07		29.6296	48.1481	55.5556	66.6667	66.6667	66.6667	70.3704	74.0741
140	140	MTD-7-12	0.6	0.43	0.39	0.37	0.34	0.34	0.3	0.28	0.25		28.3333	35	38.3333	43.3333	43.3333	50	53.3333	58.3333
141	141	MTD-9-1	0.4	0.28	0.25	0.19	0.18	0.14	0.14	0.13	0.12		30	37.5	52.5	55	65	65	67.5	70
142	142	MTD-9-2	0.46	0.35	0.29	0.25	0.23	0.17	0.16	0.15	0.13		23.913	36.9565	45.6522	50	63.0435	65.2174	67.3913	71.7391
143	143	MTD-9-3	0.37	0.29	0.28	0.25	0.25	0.25	0.22	0.19	0.18		21.6216	24.3243	32.4324	32.4324	32.4324	40.5405	48.6486	51.3514
144	144	MTD-9-4	0.39	0.27	0.21	0.18	0.15	0.14	0.12	0.1	0.09		30.7692	46.1538	53.8462	61.5385	64.1026	69.2308	74.359	76.9231
145	145	MTD-9-5	0.39	0.28	0.25	0.24	0.2	0.2	0.19	0.17	0.14		28.2051	35.8974	38.4615	48.7179	48.7179	51.2821	56.4103	64.1026
146	146	MTD-9-6	0.5	0.36	0.32	0.29	0.27	0.24	0.21	0.18	0.17		28	36	42	46	52	58	64	66
147	147	MTD-9-7	0.14	0.1	0.08	0.08	0.07	0.06	0.05	0.05	0.05		28.5714	42.8571	42.8571	50	57.1429	64.2857	64.2857	64.2857
148	148	MTD-9-8	0.2	0.13	0.11	0.11	0.1	0.08	0.07	0.07	0.07		35	45	45	50	60	65	65	65
149	149	MTD-9-9	0.33	0.23	0.22	0.19	0.18	0.18	0.16	0.15	0.15		30.303	33.3333	42.4242	45.4545	45.4545	51.5152	54.5455	54.5455
150	150	MTD-9-10	0.44	0.25	0.24	0.2	0.17	0.15	0.14	0.12	0.12		43.1818	45.4545	54.5455	61.3636	65.9091	68.1818	72.7273	72.7273
151	151	MTD-9-11	0.23	0.16	0.15	0.12	0.11	0.1	0.09	0.09	0.09		30.4348	34.7826	47.8261	52.1739	56.5217	60.8696	60.8696	60.8696
152	152	MTD-9-12	0.33	0.24	0.22	0.21	0.17	0.12	0.12	0.12	0.1		27.2727	33.3333	36.3636	48.4848	63.6364	63.6364	63.6364	69.697
153	153	MTD-9-13	0.52	0.35	0.33	0.27	0.24	0.19	0.18	0.15	0.15		32.6923	36.5385	48.0769	53.8462	63.4615	65.3846	71.1538	71.1538
154	154	MTD-9-14	0.47	0.36	0.31	0.27	0.27	0.24	0.21	0.2	0.16		23.4043	34.0426	42.5532	42.5532	48.9362	55.3191	57.4468	65.9574
155	155	MTD-9-15	0.37	0.26	0.24	0.2	0.1	0.2	0.17	0.17	0.14		29.7297	35.1351	45.9459	72.973	45.9459	54.0541	54.0541	62.1622
156	156	MTD-9-16	0.51	0.37	0.32	0.29	0.28	0.26	0.25	0.24	0.2		27.451	37.2549	43.1373	45.098	49.0196	50.9804	52.9412	60.7843
157	157	MTD-9-17	0.39	0.29	0.27	0.26	0.24	0.24	0.21	0.21	0.2		25.641	30.7692	33.3333	38.4615	38.4615	46.1538	46.1538	48.7179
158	158	MTD-10-1	0.52	0.37	0.32	0.28	0.24	0.22	0.18	0.16	0.14		28.8462	38.4615	46.1538	53.8462	57.6923	65.3846	69.2308	73.0769
159	159	MTD-7-13	0.33	0.24	0.22	0.18	0.17	0.15	0.13	0.1	0.1		27.2727	33.3333	45.4545	48.4848	54.5455	60.6061	69.697	69.697
160	160	MTD-9-18											#DIV/0!	#DIV/0!	#DIV/0!	#DIV/0!	#DIV/0!	#DIV/0!	#DIV/0!	#DIV/0!
161	161	MTD-5-10	0.51	0.33	0.29	0.24	0.24	0.23	0.19	0.18	0.15		35.2941	43.1373	52.9412	52.9412	54.902	62.7451	64.7059	70.5882
162	162	MTD-5-11	0.29	0.2	0.17	0.16	0.16	0.14	0.13	0.12	0.12		31.0345	41.3793	44.8276	44.8276	51.7241	55.1724	58.6207	58.6207
163	163	MTD-10-2	0.33	0.26	0.21	0.18	0.15	0.11	0.1	0.09	0.08		21.2121	36.3636	45.4545	54.5455	66.6667	69.697	72.7273	75.7576
164	164	MTD-5-12	0.31	0.22	0.2	0.19	0.16	0.14	0.13	0.12	0.12		29.0323	35.4839	38.7097	48.3871	54.8387	58.0645	61.2903	61.2903
165	165	MTD-5-13	0.52	0.39	0.34	0.31	0.28	0.25	0.24	0.23	0.19		25	34.6154	40.3846	46.1538	51.9231	53.8462	55.7692	63.4615
166	166	MTD-4-24	0.35	0.24	0.24	0.22	0.19	0.18	0.18	0.18	0.17		31.4286	31.4286	37.1429	45.7143	48.5714	48.5714	48.5714	51.4286
167	167	MTD-3-62	0.27	0.19	0.17	0.16	0.16	0.15	0.14	0.13	0.12		29.6296	37.037	40.7407	40.7407	44.4444	48.1481	51.8519	55.5556
168	168	MTD-4-25	0.47	0.33	0.3	0.28	0.27	0.24	0.24	0.23	0.23		29.7872	36.1702	40.4255	42.5532	48.9362	48.9362	51.0638	51.0638
169	169	MTD-10-3	0.37	0.25	0.23	0.21	0.21	0.2	0.19	0.17	0.15		32.4324	37.8378	43.2432	43.2432	45.9459	48.6486	54.0541	59.4595
170	170	MTD-10-4	0.5	0.36	0.32	0.3	0.28	0.23	0.23	0.23	0.19		28	36	40	44	54	54	54	62
171	171	MTD-3-63	0.35	0.24	0.23	0.18	0.14	0.13	0.12	0.12	0.11		31.4286	34.2857	48.5714	60	62.8571	65.7143	65.7143	68.5714
172	172	MTD-10-5	0.5	0.4	0.38	0.34	0.34	0.32	0.29	0.28	0.27		20	24	32	32	36	42	44	46
173	173	MTD-6-3	0.41	0.32	0.27	0.26	0.21	0.18	0.18	0.17	0.14		21.9512	34.1463	36.5854	48.7805	56.0976	56.0976	58.5366	65.8537
174	174	MTD-9-19	0.35	0.26	0.24	0.2	0.2	0.2	0.2	0.16	0.16		25.7143	31.4286	42.8571	42.8571	42.8571	42.8571	54.2857	54.2857
175	175	MTD-6-4	0.42	0.32	0.28	0.23	0.2	0.15	0.15	0.13	0.12		23.8095	33.3333	45.2381	52.381	64.2857	64.2857	69.0476	71.4286
176	176	MTD-4-26	0.46	0.35	0.33	0.3	0.28	0.26	0.25	0.24	0.22		23.913	28.2609	34.7826	39.1304	43.4783	45.6522	47.8261	52.1739
177	177	MTD-5-14	0.62	0.42	0.37	0.32	0.28	0.26	0.25	0.2	0.17		32.2581	40.3226	48.3871	54.8387	58.0645	59.6774	67.7419	72.5806
178	178	MTD-4-27	0.74	0.54	0.5	0.47	0.45	0.4	0.38	0.33	0.31		27.027	32.4324	36.4865	39.1892	45.9459	48.6486	55.4054	58.1081
179	179	MTD-2-71	0.4	0.29	0.28	0.26	0.23	0.19	0.18	0.17	0.17		27.5	30	35	42.5	52.5	55	57.5	57.5
180	180	MTD-2-72	0.4	0.26	0.23	0.19	0.17	0.15	0.13	0.13	0.1		35	42.5	52.5	57.5	62.5	67.5	67.5	75
181	181	MTD-3-64	0.52	0.41	0.33	0.32	0.28	0.25	0.24	0.2	0.18		21.1538	36.5385	38.4615	46.1538	51.9231	53.8462	61.5385	65.3846
182	182	MTD-3-65	0.62	0.43	0.38	0.35	0.31	0.31	0.24	0.23	0.2		30.6452	38.7097	43.5484	50	50	61.2903	62.9032	67.7419
183	183	MTD-3-66	0.33	0.26	0.23	0.23	0.21	0.21	0.19	0.18	0.16		21.2121	30.303	30.303	36.3636	36.3636	42.4242	45.4545	51.5152
184	184	MTD-7-14	0.5	0.37	0.33	0.28	0.25	0.23	0.21	0.18	0.17		26	34	44	50	54	58	64	66
185	185	MTD-5-15	0.39	0.3	0.25	0.23	0.21	0.2	0.2	0.19	0.18		23.0769	35.8974	41.0256	46.1538	48.7179	48.7179	51.2821	53.8462
186	186	MTD-3-67	0.46	0.31	0.28	0.26	0.24	0.24	0.22	0.21	0.21		32.6087	39.1304	43.4783	47.8261	47.8261	52.1739	54.3478	54.3478
187	187	MTD-9-20	0.5	0.35	0.32	0.27	0.26	0.25	0.25	0.23	0.23		30	36	46	48	50	50	54	54
188	188	MTD-9-21	0.52	0.32	0.24	0.24	0.24	0.23	0.23	0.2	0.19		38.4615	53.8462	53.8462	53.8462	55.7692	55.7692	61.5385	63.4615
189	189	MTD-7-15	0.28	0.17	0.13	0.12	0.12	0.11	0.13	0.11	0.09		39.2857	53.5714	57.1429	57.1429	60.7143	53.5714	60.7143	67.8571
190	190	MTD-9-22	0.56	0.37	0.31	0.29	0.28	0.22	0.22	0.22	0.22		33.9286	44.6429	48.2143	50	60.7143	60.7143	60.7143	60.7143
191	191	MTD-4-28	0.51	0.36	0.19	0.26	0.22	0.22	0.16	0.16	0.15		29.4118	62.7451	49.0196	56.8627	56.8627	68.6275	68.6275	70.5882
192	192	MTD-8-2	0.38	0.28	0.25	0.23	0.21	0.18	0.18	0.2	0.19		26.3158	34.2105	39.4737	44.7368	52.6316	52.6316	47.3684	50
193	193	MTD-6-5	0.34	0.24	0.22	0.18	0.17	0.16	0.16	0.15	0.15		29.4118	35.2941	47.0588	50	52.9412	52.9412	55.8824	55.8824
194	194	MTD-7-16	0.42	0.31	0.28	0.26	0.24	0.16	0.16	0.16	0.16		26.1905	33.3333	38.0952	42.8571	61.9048	61.9048	61.9048	61.9048
195	195	MTD-6-6	0.44	0.31	0.28	0.26	0.23	0.23	0.23	0.2	0.16		29.5455	36.3636	40.9091	47.7273	47.7273	47.7273	54.5455	63.6364
196	196	MTD-7-17	0.3	0.21	0.21	0.19	0.18	0.15	0.15	0.15	0.14		30	30	36.6667	40	50	50	50	53.3333
197	197	MTD-6-7	0.48	0.31	0.24	0.24	0.21	0.21	0.21	0.19	0.18		35.4167	50	50	56.25	56.25	56.25	60.4167	62.5
198	198	MTD-7-18	0.29	0.2	0.17	0.17	0.15	0.15	0.14	0.13	0.13		31.0345	41.3793	41.3793	48.2759	48.2759	51.7241	55.1724	55.1724
199	199	MTD-10-6	0.42	0.32	0.28	0.26	0.26	0.2	0.2	0.2	0.2		23.8095	33.3333	38.0952	38.0952	52.381	52.381	52.381	52.381
200	200	MTD-4-29											#DIV/0!	#DIV/0!	#DIV/0!	#DIV/0!	#DIV/0!	#DIV/0!	#DIV/0!	#DIV/0!
201	201	MTD-3-68	0.22	0.16	0.14	0.13	0.13	0.13	0.12	0.12	0.1		27.2727	36.3636	40.9091	40.9091	40.9091	45.4545	45.4545	54.5455
202	202	MTD-7-19	0.42	0.29	0.27	0.23	0.22	0.22	0.18	0.18	0.16		30.9524	35.7143	45.2381	47.619	47.619	57.1429	57.1429	61.9048
203	203	MTD-6-8	0.39	0.3	0.26	0.24	0.21	0.21	0.2	0.19	0.18		23.0769	33.3333	38.4615	46.1538	46.1538	48.7179	51.2821	53.8462
204	204	MTD-7-20	0.29	0.22	0.2	0.19	0.19	0.19	0.18	0.16	0.15		24.1379	31.0345	34.4828	34.4828	34.4828	37.931	44.8276	48.2759
205	205	MTD-2-73	0.46	0.35	0.31	0.27	0.26	0.26	0.24	0.15	0.15		23.913	32.6087	41.3043	43.4783	43.4783	47.8261	67.3913	67.3913
206	206	MTD-2-74											#DIV/0!	#DIV/0!	#DIV/0!	#DIV/0!	#DIV/0!	#DIV/0!	#DIV/0!	#DIV/0!
207	207	MTD-3-69	0.33	0.24	0.21	0.18	0.18	0.17	0.15	0.15	0.13		27.2727	36.3636	45.4545	45.4545	48.4848	54.5455	54.5455	60.6061
208	208	MTD-1-53	0.36	0.25	0.21	0.18	0.18	0.15	0.145	0.14	0.12		30.5556	41.6667	50	50	58.3333	59.7222	61.1111	66.6667
209	209	MTD-2-75	0.44	0.28	0.27	0.25	0.25	0.24	0.22	0.22	0.18		36.3636	38.6364	43.1818	43.1818	45.4545	50	50	59.0909
210	210	MTD-3-70	0.36	0.22	0.2	0.19	0.19	0.15	0.14	0.14	0.08		38.8889	44.4444	47.2222	47.2222	58.3333	61.1111	61.1111	77.7778
211	211	MTD-3-71	0.37	0.24	0.23	0.2	0.17	0.15	0.15	0.13	0.1		35.1351	37.8378	45.9459	54.0541	59.4595	59.4595	64.8649	72.973
212	212	MTD-3-72	0.27	0.16	0.15	0.11	0.11	0.11	0.11	0.1	0.09		40.7407	44.4444	59.2593	59.2593	59.2593	59.2593	62.963	66.6667
213	213	MTD-3-73	0.42	0.3	0.26	0.23	0.22	0.19	0.16	0.15	0.15		28.5714	38.0952	45.2381	47.619	54.7619	61.9048	64.2857	64.2857
214	214	MTD-3-74	0.36	0.25	0.22	0.19	0.17	0.15	0.15	0.14	0.13		30.5556	38.8889	47.2222	52.7778	58.3333	58.3333	61.1111	63.8889
215	215	MTD-3-75	0.52	0.35	0.32	0.31	0.31	0.26	0.23	0.22	0.21		32.6923	38.4615	40.3846	40.3846	50	55.7692	57.6923	59.6154
216	216	MTD-2-76	0.39	0.25	0.23	0.23	0.21	0.23	0.18	0.17	0.17		35.8974	41.0256	41.0256	46.1538	41.0256	53.8462	56.4103	56.4103
217	217	MTD-2-77	0.56	0.44	0.36	0.31	0.24	0.18	0.18	0.16	0.15		21.4286	35.7143	44.6429	57.1429	67.8571	67.8571	71.4286	73.2143
218	218	MTD-3-76	0.21	0.13	0.12	0.11	0.1	0.18	0.08	0.07	0.06		38.0952	42.8571	47.619	52.381	14.2857	61.9048	66.6667	71.4286
219	219	MTD-3-77	0.51	0.33	0.27	0.24	0.22	0.08	0.16	0.15	0.12		35.2941	47.0588	52.9412	56.8627	84.3137	68.6275	70.5882	76.4706
220	220	MTD-1-54	0.45	0.27	0.24	0.19	0.16	0.16	0.15	0.12	0.12		40	46.6667	57.7778	64.4444	64.4444	66.6667	73.3333	73.3333
221	221	MTD-2-78	0.58	0.35	0.31	0.29	0.28	0.27	0.24	0.23	0.19		39.6552	46.5517	50	51.7241	53.4483	58.6207	60.3448	67.2414
222	222	MTD-3-78	0.51	0.34	0.3	0.29	0.27	0.25	0.23	0.23	0.23		33.3333	41.1765	43.1373	47.0588	50.9804	54.902	54.902	54.902
223	223	MTD-4-30	0.58	0.37	0.35	0.33	0.31	0.3	0.3	0.24	0.24		36.2069	39.6552	43.1034	46.5517	48.2759	48.2759	58.6207	58.6207
224	224	MTD-9-23	0.43	0.31	0.28	0.26	0.23	0.2	0.18	0.16	0.15		27.907	34.8837	39.5349	46.5116	53.4884	58.1395	62.7907	65.1163
225	225	MTD-4-31	0.33	0.24	0.23	0.25	0.19	0.19	0.18	0.17	0.15		27.2727	30.303	24.2424	42.4242	42.4242	45.4545	48.4848	54.5455
226	226	MTD-9-24	0.36	0.28	0.28	0.26	0.24	0.23	0.19	0.19	0.19		22.2222	22.2222	27.7778	33.3333	36.1111	47.2222	47.2222	47.2222
227	227	MTD-3-79	0.44	0.35	0.28	0.26	0.24	0.23	0.21	0.19	0.17		20.4545	36.3636	40.9091	45.4545	47.7273	52.2727	56.8182	61.3636
228	228	MTD-3-80	0.27	0.19	0.18	0.16	0.15	0.14	0.14	0.11	0.1		29.6296	33.3333	40.7407	44.4444	48.1481	48.1481	59.2593	62.963
229	229	MTD-3-81	0.57	0.44	0.39	0.38	0.33	0.33	0.28	0.27	0.25		22.807	31.5789	33.3333	42.1053	42.1053	50.8772	52.6316	56.1404
230	230	MTD-3-82	0.51	0.38	0.34	0.3	0.28	0.27	0.26	0.23	0.23		25.4902	33.3333	41.1765	45.098	47.0588	49.0196	54.902	54.902
231	231	MTD-3-83	0.42	0.31	0.28	0.26	0.23	0.21	0.2	0.18	0.15		26.1905	33.3333	38.0952	45.2381	50	52.381	57.1429	64.2857
232	232	MTD-3-84	0.42	0.33	0.28	0.25	0.22	0.2	0.2	0.18	0.17		21.4286	33.3333	40.4762	47.619	52.381	52.381	57.1429	59.5238
233	233	GG-20	0.58	0.32	0.31	0.28	0.26	0.23	0.21	0.21	0.16		44.8276	46.5517	51.7241	55.1724	60.3448	63.7931	63.7931	72.4138

## Sheet: dehydration-sorted
Sr. No	Plant No	Line No	Fresh wt	1	2	3	4	5	6	7	8		1	2	3	4	5	6	7	8
233	233	GG-20	0.58	0.32	0.31	0.28	0.26	0.23	0.21	0.21	0.16		44.8276	46.5517	51.7241	55.1724	60.3448	63.7931	63.7931	72.4138
158	158	MTD-10-1	0.52	0.37	0.32	0.28	0.24	0.22	0.18	0.16	0.14		28.8462	38.4615	46.1538	53.8462	57.6923	65.3846	69.2308	73.0769
163	163	MTD-10-2	0.33	0.26	0.21	0.18	0.15	0.11	0.1	0.09	0.08		21.2121	36.3636	45.4545	54.5455	66.6667	69.697	72.7273	75.7576
169	169	MTD-10-3	0.37	0.25	0.23	0.21	0.21	0.2	0.19	0.17	0.15		32.4324	37.8378	43.2432	43.2432	45.9459	48.6486	54.0541	59.4595
170	170	MTD-10-4	0.5	0.36	0.32	0.3	0.28	0.23	0.23	0.23	0.19		28	36	40	44	54	54	54	62
172	172	MTD-10-5	0.5	0.4	0.38	0.34	0.34	0.32	0.29	0.28	0.27		20	24	32	32	36	42	44	46
199	199	MTD-10-6	0.42	0.32	0.28	0.26	0.26	0.2	0.2	0.2	0.2		23.8095	33.3333	38.0952	38.0952	52.381	52.381	52.381	52.381
1	1	MTD-1-32	0.48	0.37	0.33	0.3	0.27	0.26	0.24	0.23	0.21		22.9167	31.25	37.5	43.75	45.8333	50	52.0833	56.25
2	2	MTD-1-33	0.44	0.34	0.33	0.28	0.28	0.24	0.24	0.24	0.22		22.7273	25	36.3636	36.3636	45.4545	45.4545	45.4545	50
3	3	MTD-1-34	0.28	0.19	0.16	0.15	0.14	0.13	0.12	0.12	0.11		32.1429	42.8571	46.4286	50	53.5714	57.1429	57.1429	60.7143
4	4	MTD-1-35	0.42	0.31	0.26	0.26	0.24	0.22	0.21	0.2	0.19		26.1905	38.0952	38.0952	42.8571	47.619	50	52.381	54.7619
5	5	MTD-1-36	0.61	0.38	0.37	0.33	0.32	0.31	0.27	0.27	0.24		37.7049	39.3443	45.9016	47.541	49.1803	55.7377	55.7377	60.6557
6	6	MTD-1-37	0.33	0.21	0.19	0.18	0.18	0.17	0.14	0.14	0.14		36.3636	42.4242	45.4545	45.4545	48.4848	57.5758	57.5758	57.5758
7	7	MTD-1-38	0.56	0.36	0.31	0.29	0.27	0.27	0.2	0.2	0.2		35.7143	44.6429	48.2143	51.7857	51.7857	64.2857	64.2857	64.2857
8	8	MTD-1-39	0.2	0.19	0.18	0.18	0.14	0.14	0.13	0.13	0.11		5	10	10	30	30	35	35	45
9	9	MTD-1-40	0.44	0.29	0.26	0.26	0.23	0.21	0.18	0.14	0.14		34.0909	40.9091	40.9091	47.7273	52.2727	59.0909	68.1818	68.1818
10	10	MTD-1-41	0.42	0.29	0.26	0.23	0.23	0.23	0.22	0.19	0.19		30.9524	38.0952	45.2381	45.2381	45.2381	47.619	54.7619	54.7619
11	11	MTD-1-42	0.33	0.24	0.23	0.23	0.19	0.17	0.16	0.15	0.13		27.2727	30.303	30.303	42.4242	48.4848	51.5152	54.5455	60.6061
12	12	MTD-1-43	0.39	0.28	0.26	0.25	0.24	0.24	0.21	0.28	0.17		28.2051	33.3333	35.8974	38.4615	38.4615	46.1538	28.2051	56.4103
13	13	MTD-1-44	0.57	0.37	0.31	0.31	0.27	0.27	0.24	0.23	0.23		35.0877	45.614	45.614	52.6316	52.6316	57.8947	59.6491	59.6491
14	14	MTD-1-45	0.6	0.35	0.29	0.28	0.27	0.25	0.22	0.21	0.2		41.6667	51.6667	53.3333	55	58.3333	63.3333	65	66.6667
15	15	MTD-1-46	0.63	0.39	0.36	0.32	0.31	0.3	0.25	0.24	0.21		38.0952	42.8571	49.2063	50.7937	52.381	60.3175	61.9048	66.6667
16	16	MTD-1-47	0.31	0.16	0.13	0.12	0.1	0.08	0.07	0.07	0.05		48.3871	58.0645	61.2903	67.7419	74.1935	77.4194	77.4194	83.871
17	17	MTD-1-48	0.49	0.3	0.29	0.25	0.24	0.23	0.21	0.21	0.2		38.7755	40.8163	48.9796	51.0204	53.0612	57.1429	57.1429	59.1837
18	18	MTD-1-49	0.43	0.25	0.22	0.21	0.21	0.21	0.18	0.15	0.15		41.8605	48.8372	51.1628	51.1628	51.1628	58.1395	65.1163	65.1163
19	19	MTD-1-50	0.73	0.48	0.42	0.39	0.39	0.34	0.32	0.314	0.31		34.2466	42.4658	46.5753	46.5753	53.4247	56.1644	56.9863	57.5342
20	20	MTD-1-51	0.3	0.18	0.17	0.14	0.14	0.12	0.11	0.12	0.1		40	43.3333	53.3333	53.3333	60	63.3333	60	66.6667
21	21	MTD-1-52	0.45	0.33	0.29	0.29	0.29	0.23	0.23	0.22	0.18		26.6667	35.5556	35.5556	35.5556	48.8889	48.8889	51.1111	60
208	208	MTD-1-53	0.36	0.25	0.21	0.18	0.18	0.15	0.145	0.14	0.12		30.5556	41.6667	50	50	58.3333	59.7222	61.1111	66.6667
220	220	MTD-1-54	0.45	0.27	0.24	0.19	0.16	0.16	0.15	0.12	0.12		40	46.6667	57.7778	64.4444	64.4444	66.6667	73.3333	73.3333
22	22	MTD-2-46	0.44	0.26	0.24	0.23	0.23	0.19	0.19	0.18	0.18		40.9091	45.4545	47.7273	47.7273	56.8182	56.8182	59.0909	59.0909
23	23	MTD-2-47	0.21	0.13	0.11	0.11	0.11	0.09	0.08	0.08	0.06		38.0952	47.619	47.619	47.619	57.1429	61.9048	61.9048	71.4286
24	24	MTD-2-48	0.39	0.3	0.26	0.26	0.26	0.22	0.2	0.19	0.19		23.0769	33.3333	33.3333	33.3333	43.5897	48.7179	51.2821	51.2821
25	25	MTD-2-49	0.33	0.23	0.21	0.18	0.18	0.15	0.14	0.13	0.11		30.303	36.3636	45.4545	45.4545	54.5455	57.5758	60.6061	66.6667
26	26	MTD-2-50	0.33	0.21	0.19	0.19	0.19	0.16	0.13	0.13	0.13		36.3636	42.4242	42.4242	42.4242	51.5152	60.6061	60.6061	60.6061
27	27	MTD-2-51	0.51	0.37	0.35	0.31	0.31	0.27	0.27	0.24	0.24		27.451	31.3725	39.2157	39.2157	47.0588	47.0588	52.9412	52.9412
28	28	MTD-2-52	0.4	0.28	0.25	0.24	0.24	0.23	0.23	0.2	0.2		30	37.5	40	40	42.5	42.5	50	50
29	29	MTD-2-53	0.45	0.3	0.29	0.26	0.236	0.23	0.22	0.2	0.19		33.3333	35.5556	42.2222	47.5556	48.8889	51.1111	55.5556	57.7778
30	30	MTD-2-54	0.47	0.34	0.31	0.23	0.23	0.27	0.2	0.25	0.25		27.6596	34.0426	51.0638	51.0638	42.5532	57.4468	46.8085	46.8085
31	31	MTD-2-55	0.52	0.41	0.36	0.34	0.3	0.3	0.26	0.25	0.24		21.1538	30.7692	34.6154	42.3077	42.3077	50	51.9231	53.8462
32	32	MTD-2-56	0.48	0.33	0.31	0.29	0.27	0.25	0.23	0.23	0.21		31.25	35.4167	39.5833	43.75	47.9167	52.0833	52.0833	56.25
33	33	MTD-2-57	0.62	0.41	0.41	0.4	0.35	0.33	0.33	0.3	0.25		33.871	33.871	35.4839	43.5484	46.7742	46.7742	51.6129	59.6774
34	34	MTD-2-58	0.48	0.28	0.28	0.26	0.24	0.23	0.2	0.2	0.18		41.6667	41.6667	45.8333	50	52.0833	58.3333	58.3333	62.5
35	35	MTD-2-59	0.56	0.29	0.29	0.28	0.27	0.25	0.23	0.21	0.21		48.2143	48.2143	50	51.7857	55.3571	58.9286	62.5	62.5
36	36	MTD-2-60	0.6	0.37	0.34	0.32	0.29	0.29	0.28	0.26	0.24		38.3333	43.3333	46.6667	51.6667	51.6667	53.3333	56.6667	60
37	37	MTD-2-61	0.41	0.28	0.22	0.18	0.16	0.16	0.14	0.13	0.11		31.7073	46.3415	56.0976	60.9756	60.9756	65.8537	68.2927	73.1707
38	38	MTD-2-62	0.58	0.37	0.34	0.32	0.28	0.28	0.27	0.24	0.24		36.2069	41.3793	44.8276	51.7241	51.7241	53.4483	58.6207	58.6207
39	39	MTD-2-63	0.5	0.31	0.26	0.26	0.24	0.24	0.21	0.19	0.18		38	48	48	52	52	58	62	64
40	40	MTD-2-64	0.77	0.48	0.42	0.4	0.38	0.35	0.35	0.34	0.31		37.6623	45.4545	48.0519	50.6494	54.5455	54.5455	55.8442	59.7403
41	41	MTD-2-65	0.53	0.38	0.34	0.31	0.29	0.29	0.27	0.24	0.23		28.3019	35.8491	41.5094	45.283	45.283	49.0566	54.717	56.6038
42	42	MTD-2-66	0.82	0.57	0.52	0.48	0.45	0.41	0.4	0.36	0.36		30.4878	36.5854	41.4634	45.122	50	51.2195	56.0976	56.0976
43	43	MTD-2-67	0.3	0.22	0.19	0.19	0.18	0.17	0.16	0.16	0.16		26.6667	36.6667	36.6667	40	43.3333	46.6667	46.6667	46.6667
44	44	MTD-2-68	0.49	0.32	0.27	0.26	0.24	0.23	0.21	0.2	0.19		34.6939	44.898	46.9388	51.0204	53.0612	57.1429	59.1837	61.2245
45	45	MTD-2-69	0.74	0.44	0.37	0.35	0.34	0.31	0.27	0.26	0.22		40.5405	50	52.7027	54.0541	58.1081	63.5135	64.8649	70.2703
46	46	MTD-2-70	0.19	0.13	0.1	0.07	0.06	0.06	0.06	0.06	0.05		31.5789	47.3684	63.1579	68.4211	68.4211	68.4211	68.4211	73.6842
179	179	MTD-2-71	0.4	0.29	0.28	0.26	0.23	0.19	0.18	0.17	0.17		27.5	30	35	42.5	52.5	55	57.5	57.5
180	180	MTD-2-72	0.4	0.26	0.23	0.19	0.17	0.15	0.13	0.13	0.1		35	42.5	52.5	57.5	62.5	67.5	67.5	75
205	205	MTD-2-73	0.46	0.35	0.31	0.27	0.26	0.26	0.24	0.15	0.15		23.913	32.6087	41.3043	43.4783	43.4783	47.8261	67.3913	67.3913
209	209	MTD-2-75	0.44	0.28	0.27	0.25	0.25	0.24	0.22	0.22	0.18		36.3636	38.6364	43.1818	43.1818	45.4545	50	50	59.0909
216	216	MTD-2-76	0.39	0.25	0.23	0.23	0.21	0.23	0.18	0.17	0.17		35.8974	41.0256	41.0256	46.1538	41.0256	53.8462	56.4103	56.4103
217	217	MTD-2-77	0.56	0.44	0.36	0.31	0.24	0.18	0.18	0.16	0.15		21.4286	35.7143	44.6429	57.1429	67.8571	67.8571	71.4286	73.2143
221	221	MTD-2-78	0.58	0.35	0.31	0.29	0.28	0.27	0.24	0.23	0.19		39.6552	46.5517	50	51.7241	53.4483	58.6207	60.3448	67.2414
53	53	MTD-3-10	0.33	0.24	0.22	0.2	0.18	0.17	0.16	0.15	0.13		27.2727	33.3333	39.3939	45.4545	48.4848	51.5152	54.5455	60.6061
54	54	MTD-3-11	0.4	0.26	0.24	0.21	0.2	0.18	0.14	0.14	0.12		35	40	47.5	50	55	65	65	70
55	55	MTD-3-12	0.49	0.24	0.2	0.2	0.19	0.18	0.15	0.15	0.15		51.0204	59.1837	59.1837	61.2245	63.2653	69.3878	69.3878	69.3878
56	56	MTD-3-13	0.41	0.32	0.29	0.27	0.24	0.22	0.21	0.19	0.18		21.9512	29.2683	34.1463	41.4634	46.3415	48.7805	53.6585	56.0976
57	57	MTD-3-14	0.46	0.35	0.31	0.29	0.28	0.27	0.26	0.22	0.22		23.913	32.6087	36.9565	39.1304	41.3043	43.4783	52.1739	52.1739
58	58	MTD-3-15	0.33	0.2	0.2	0.17	0.16	0.18	0.14	0.11	0.11		39.3939	39.3939	48.4848	51.5152	45.4545	57.5758	66.6667	66.6667
59	59	MTD-3-16	0.32	0.21	0.2	0.19	0.2	0.15	0.15	0.15	0.15		34.375	37.5	40.625	37.5	53.125	53.125	53.125	53.125
60	60	MTD-3-17	0.44	0.3	0.27	0.25	0.25	0.19	0.19	0.19	0.19		31.8182	38.6364	43.1818	43.1818	56.8182	56.8182	56.8182	56.8182
61	61	MTD-3-18	0.42	0.25	0.24	0.22	0.22	0.18	0.18	0.18	0.17		40.4762	42.8571	47.619	47.619	57.1429	57.1429	57.1429	59.5238
62	62	MTD-3-19	0.39	0.3	0.28	0.25	0.24	0.22	0.2	0.2	0.17		23.0769	28.2051	35.8974	38.4615	43.5897	48.7179	48.7179	56.4103
63	63	MTD-3-20	0.58	0.35	0.31	0.29	0.27	0.25	0.22	0.21	0.21		39.6552	46.5517	50	53.4483	56.8966	62.069	63.7931	63.7931
64	64	MTD-3-21	0.53	0.36	0.33	0.3	0.3	0.28	0.28	0.26	0.24		32.0755	37.7358	43.3962	43.3962	47.1698	47.1698	50.9434	54.717
65	65	MTD-3-22	0.47	0.31	0.27	0.24	0.24	0.22	0.21	0.18	0.18		34.0426	42.5532	48.9362	48.9362	53.1915	55.3191	61.7021	61.7021
66	66	MTD-3-23	0.32	0.23	0.2	0.19	0.19	0.17	0.17	0.16	0.16		28.125	37.5	40.625	40.625	46.875	46.875	50	50
67	67	MTD-3-24	0.35	0.24	0.22	0.2	0.18	0.17	0.17	0.14	0.14		31.4286	37.1429	42.8571	48.5714	51.4286	51.4286	60	60
68	68	MTD-3-25	0.27	0.21	0.16	0.14	0.13	0.13	0.12	0.11	0.11		22.2222	40.7407	48.1481	51.8519	51.8519	55.5556	59.2593	59.2593
69	69	MTD-3-26	0.52	0.38	0.33	0.3	0.27	0.26	0.25	0.24	0.24		26.9231	36.5385	42.3077	48.0769	50	51.9231	53.8462	53.8462
70	70	MTD-3-27	0.48	0.35	0.31	0.28	0.27	0.26	0.24	0.23	0.2		27.0833	35.4167	41.6667	43.75	45.8333	50	52.0833	58.3333
71	71	MTD-3-28	0.35	0.23	0.22	0.19	0.18	0.17	0.16	0.15	0.13		34.2857	37.1429	45.7143	48.5714	51.4286	54.2857	57.1429	62.8571
72	72	MTD-3-29	0.24	0.17	0.14	0.11	0.1	0.09	0.09	0.09	0.06		29.1667	41.6667	54.1667	58.3333	62.5	62.5	62.5	75
73	73	MTD-3-30	0.66	0.51	0.48	0.44	0.41	0.4	0.38	0.37	0.37		22.7273	27.2727	33.3333	37.8788	39.3939	42.4242	43.9394	43.9394
74	74	MTD-3-31	1	0.78	0.67	0.6	0.57	0.52	0.5	0.47	0.47		22	33	40	43	48	50	53	53
75	75	MTD-3-32	0.52	0.37	0.34	0.31	0.29	0.29	0.24	0.24	0.24		28.8462	34.6154	40.3846	44.2308	44.2308	53.8462	53.8462	53.8462
76	76	MTD-3-33	0.53	0.43	0.39	0.36	0.35	0.32	0.32	0.32	0.28		18.8679	26.4151	32.0755	33.9623	39.6226	39.6226	39.6226	47.1698
77	77	MTD-3-34	0.71	0.5	0.45	0.4	0.35	0.31	0.3	0.29	0.25		29.5775	36.6197	43.662	50.7042	56.338	57.7465	59.1549	64.7887
78	78	MTD-3-35	0.41	0.3	0.29	0.26	0.22	0.2	0.18	0.17	0.15		26.8293	29.2683	36.5854	46.3415	51.2195	56.0976	58.5366	63.4146
80	80	MTD-3-37	0.51	0.39	0.37	0.33	0.31	0.3	0.26	0.25	0.23		23.5294	27.451	35.2941	39.2157	41.1765	49.0196	50.9804	54.902
81	81	MTD-3-38	0.44	0.33	0.29	0.29	0.27	0.25	0.24	0.22	0.22		25	34.0909	34.0909	38.6364	43.1818	45.4545	50	50
82	82	MTD-3-39	0.4	0.31	0.29	0.27	0.26	0.25	0.23	0.21	0.21		22.5	27.5	32.5	35	37.5	42.5	47.5	47.5
83	83	MTD-3-40	0.29	0.21	0.18	0.15	0.13	0.12	0.11	0.09	0.09		27.5862	37.931	48.2759	55.1724	58.6207	62.069	68.9655	68.9655
84	84	MTD-3-41	0.45	0.31	0.28	0.25	0.23	0.19	0.18	0.17	0.14		31.1111	37.7778	44.4444	48.8889	57.7778	60	62.2222	68.8889
85	85	MTD-3-42	0.33	0.28	0.25	0.23	0.21	0.2	0.19	0.19	0.18		15.1515	24.2424	30.303	36.3636	39.3939	42.4242	42.4242	45.4545
86	86	MTD-3-43	0.62	0.46	0.43	0.41	0.39	0.36	0.35	0.33	0.32		25.8065	30.6452	33.871	37.0968	41.9355	43.5484	46.7742	48.3871
87	87	MTD-3-44	0.48	0.33	0.31	0.29	0.26	0.23	0.23	0.21	0.2		31.25	35.4167	39.5833	45.8333	52.0833	52.0833	56.25	58.3333
88	88	MTD-3-45	0.31	0.24	0.21	0.2	0.18	0.18	0.17	0.14	0.1		22.5806	32.2581	35.4839	41.9355	41.9355	45.1613	54.8387	67.7419
89	89	MTD-3-46	0.33	0.25	0.22	0.22	0.21	0.18	0.18	0.18	0.152		24.2424	33.3333	33.3333	36.3636	45.4545	45.4545	45.4545	53.9394
90	90	MTD-3-47	0.44	0.3	0.27	0.26	0.23	0.21	0.2	0.19	0.19		31.8182	38.6364	40.9091	47.7273	52.2727	54.5455	56.8182	56.8182
91	91	MTD-3-48	0.21	0.19	0.15	0.12	0.11	0.1	0.08	0.08	0.08		9.52381	28.5714	42.8571	47.619	52.381	61.9048	61.9048	61.9048
92	92	MTD-3-49	0.34	0.24	0.22	0.19	0.17	0.17	0.16	0.14	0.14		29.4118	35.2941	44.1176	50	50	52.9412	58.8235	58.8235
93	93	MTD-3-50	0.33	0.23	0.23	0.21	0.18	0.17	0.16	0.11	0.11		30.303	30.303	36.3636	45.4545	48.4848	51.5152	66.6667	66.6667
94	94	MTD-3-51	0.45	0.37	0.36	0.34	0.33	0.3	0.29	0.29	0.29		17.7778	20	24.4444	26.6667	33.3333	35.5556	35.5556	35.5556
95	95	MTD-3-52	0.36	0.29	0.27	0.25	0.24	0.24	0.23	0.21	0.2		19.4444	25	30.5556	33.3333	33.3333	36.1111	41.6667	44.4444
96	96	MTD-3-53	0.43	0.34	0.32	0.29	0.27	0.21	0.2	0.2	0.2		20.9302	25.5814	32.5581	37.2093	51.1628	53.4884	53.4884	53.4884
97	97	MTD-3-54	0.41	0.26	0.24	0.23	0.21	0.21	0.2	0.2	0.19		36.5854	41.4634	43.9024	48.7805	48.7805	51.2195	51.2195	53.6585
98	98	MTD-3-55	0.47	0.35	0.32	0.3	0.28	0.28	0.24	0.23	0.21		25.5319	31.9149	36.1702	40.4255	40.4255	48.9362	51.0638	55.3191
99	99	MTD-3-56	0.53	0.4	0.37	0.36	0.33	0.32	0.3	0.24	0.24		24.5283	30.1887	32.0755	37.7358	39.6226	43.3962	54.717	54.717
100	100	MTD-3-57	0.56	0.44	0.4	0.39	0.35	0.33	0.29	0.29	0.28		21.4286	28.5714	30.3571	37.5	41.0714	48.2143	48.2143	50
101	101	MTD-3-58	0.26	0.22	0.17	0.15	0.14	0.12	0.12	0.11	0.1		15.3846	34.6154	42.3077	46.1538	53.8462	53.8462	57.6923	61.5385
102	102	MTD-3-59	0.44	0.33	0.3	0.28	0.24	0.21	0.19	0.18	0.17		25	31.8182	36.3636	45.4545	52.2727	56.8182	59.0909	61.3636
49	49	MTD-3-6	0.44	0.16	0.23	0.23	0.21	0.19	0.18	0.16	0.16		63.6364	47.7273	47.7273	52.2727	56.8182	59.0909	63.6364	63.6364
103	103	MTD-3-60	0.51	0.36	0.32	0.31	0.28	0.27	0.23	0.23	0.22		29.4118	37.2549	39.2157	45.098	47.0588	54.902	54.902	56.8627
104	104	MTD-3-61	0.37	0.28	0.24	0.23	0.2	0.19	0.17	0.15	0.14		24.3243	35.1351	37.8378	45.9459	48.6486	54.0541	59.4595	62.1622
167	167	MTD-3-62	0.27	0.19	0.17	0.16	0.16	0.15	0.14	0.13	0.12		29.6296	37.037	40.7407	40.7407	44.4444	48.1481	51.8519	55.5556
171	171	MTD-3-63	0.35	0.24	0.23	0.18	0.14	0.13	0.12	0.12	0.11		31.4286	34.2857	48.5714	60	62.8571	65.7143	65.7143	68.5714
181	181	MTD-3-64	0.52	0.41	0.33	0.32	0.28	0.25	0.24	0.2	0.18		21.1538	36.5385	38.4615	46.1538	51.9231	53.8462	61.5385	65.3846
182	182	MTD-3-65	0.62	0.43	0.38	0.35	0.31	0.31	0.24	0.23	0.2		30.6452	38.7097	43.5484	50	50	61.2903	62.9032	67.7419
183	183	MTD-3-66	0.33	0.26	0.23	0.23	0.21	0.21	0.19	0.18	0.16		21.2121	30.303	30.303	36.3636	36.3636	42.4242	45.4545	51.5152
186	186	MTD-3-67	0.46	0.31	0.28	0.26	0.24	0.24	0.22	0.21	0.21		32.6087	39.1304	43.4783	47.8261	47.8261	52.1739	54.3478	54.3478
201	201	MTD-3-68	0.22	0.16	0.14	0.13	0.13	0.13	0.12	0.12	0.1		27.2727	36.3636	40.9091	40.9091	40.9091	45.4545	45.4545	54.5455
207	207	MTD-3-69	0.33	0.24	0.21	0.18	0.18	0.17	0.15	0.15	0.13		27.2727	36.3636	45.4545	45.4545	48.4848	54.5455	54.5455	60.6061
50	50	MTD-3-7	0.41	0.27	0.26	0.24	0.22	0.22	0.2	0.19	0.19		34.1463	36.5854	41.4634	46.3415	46.3415	51.2195	53.6585	53.6585
210	210	MTD-3-70	0.36	0.22	0.2	0.19	0.19	0.15	0.14	0.14	0.08		38.8889	44.4444	47.2222	47.2222	58.3333	61.1111	61.1111	77.7778
211	211	MTD-3-71	0.37	0.24	0.23	0.2	0.17	0.15	0.15	0.13	0.1		35.1351	37.8378	45.9459	54.0541	59.4595	59.4595	64.8649	72.973
212	212	MTD-3-72	0.27	0.16	0.15	0.11	0.11	0.11	0.11	0.1	0.09		40.7407	44.4444	59.2593	59.2593	59.2593	59.2593	62.963	66.6667
213	213	MTD-3-73	0.42	0.3	0.26	0.23	0.22	0.19	0.16	0.15	0.15		28.5714	38.0952	45.2381	47.619	54.7619	61.9048	64.2857	64.2857
214	214	MTD-3-74	0.36	0.25	0.22	0.19	0.17	0.15	0.15	0.14	0.13		30.5556	38.8889	47.2222	52.7778	58.3333	58.3333	61.1111	63.8889
215	215	MTD-3-75	0.52	0.35	0.32	0.31	0.31	0.26	0.23	0.22	0.21		32.6923	38.4615	40.3846	40.3846	50	55.7692	57.6923	59.6154
218	218	MTD-3-76	0.21	0.13	0.12	0.11	0.1	0.18	0.08	0.07	0.06		38.0952	42.8571	47.619	52.381	14.2857	61.9048	66.6667	71.4286
219	219	MTD-3-77	0.51	0.33	0.27	0.24	0.22	0.08	0.16	0.15	0.12		35.2941	47.0588	52.9412	56.8627	84.3137	68.6275	70.5882	76.4706
222	222	MTD-3-78	0.51	0.34	0.3	0.29	0.27	0.25	0.23	0.23	0.23		33.3333	41.1765	43.1373	47.0588	50.9804	54.902	54.902	54.902
227	227	MTD-3-79	0.44	0.35	0.28	0.26	0.24	0.23	0.21	0.19	0.17		20.4545	36.3636	40.9091	45.4545	47.7273	52.2727	56.8182	61.3636
51	51	MTD-3-8	0.6	0.41	0.34	0.34	0.33	0.32	0.31	0.29	0.29		31.6667	43.3333	43.3333	45	46.6667	48.3333	51.6667	51.6667
228	228	MTD-3-80	0.27	0.19	0.18	0.16	0.15	0.14	0.14	0.11	0.1		29.6296	33.3333	40.7407	44.4444	48.1481	48.1481	59.2593	62.963
229	229	MTD-3-81	0.57	0.44	0.39	0.38	0.33	0.33	0.28	0.27	0.25		22.807	31.5789	33.3333	42.1053	42.1053	50.8772	52.6316	56.1404
230	230	MTD-3-82	0.51	0.38	0.34	0.3	0.28	0.27	0.26	0.23	0.23		25.4902	33.3333	41.1765	45.098	47.0588	49.0196	54.902	54.902
231	231	MTD-3-83	0.42	0.31	0.28	0.26	0.23	0.21	0.2	0.18	0.15		26.1905	33.3333	38.0952	45.2381	50	52.381	57.1429	64.2857
232	232	MTD-3-84	0.42	0.33	0.28	0.25	0.22	0.2	0.2	0.18	0.17		21.4286	33.3333	40.4762	47.619	52.381	52.381	57.1429	59.5238
52	52	MTD-3-9	0.53	0.37	0.34	0.3	0.3	0.27	0.25	0.24	0.24		30.1887	35.8491	43.3962	43.3962	49.0566	52.8302	54.717	54.717
113	113	MTD-4-11	0.47	0.29	0.24	0.22	0.21	0.21	0.19	0.17	0.17		38.2979	48.9362	53.1915	55.3191	55.3191	59.5745	63.8298	63.8298
114	114	MTD-4-12	0.52	0.32	0.29	0.24	0.24	0.23	0.21	0.21	0.19		38.4615	44.2308	53.8462	53.8462	55.7692	59.6154	59.6154	63.4615
115	115	MTD-4-13	0.36	0.23	0.2	0.14	0.14	0.14	0.14	0.1	0.09		36.1111	44.4444	61.1111	61.1111	61.1111	61.1111	72.2222	75
116	116	MTD-4-14	0.61	0.37	0.34	0.27	0.25	0.25	0.24	0.2	0.2		39.3443	44.2623	55.7377	59.0164	59.0164	60.6557	67.2131	67.2131
117	117	MTD-4-15	0.27	0.25	0.18	0.17	0.14	0.14	0.14	0.1	0.09		7.40741	33.3333	37.037	48.1481	48.1481	48.1481	62.963	66.6667
118	118	MTD-4-16	0.43	0.27	0.27	0.27	0.24	0.23	0.19	0.21	0.18		37.2093	37.2093	37.2093	44.186	46.5116	55.814	51.1628	58.1395
119	119	MTD-4-17	0.46	0.33	0.28	0.27	0.27	0.27	0.19	0.23	0.2		28.2609	39.1304	41.3043	41.3043	41.3043	58.6957	50	56.5217
120	120	MTD-4-18	0.43	0.34	0.31	0.29	0.25	0.21	0.15	0.15	0.15		20.9302	27.907	32.5581	41.8605	51.1628	65.1163	65.1163	65.1163
121	121	MTD-4-19	0.35	0.24	0.22	0.22	0.19	0.19	0.17	0.17	0.14		31.4286	37.1429	37.1429	45.7143	45.7143	51.4286	51.4286	60
122	122	MTD-4-20	0.52	0.35	0.31	0.29	0.28	0.26	0.24	0.24	0.22		32.6923	40.3846	44.2308	46.1538	50	53.8462	53.8462	57.6923
124	124	MTD-4-22	0.58	0.39	0.36	0.34	0.33	0.3	0.3	0.28	0.27		32.7586	37.931	41.3793	43.1034	48.2759	48.2759	51.7241	53.4483
166	166	MTD-4-24	0.35	0.24	0.24	0.22	0.19	0.18	0.18	0.18	0.17		31.4286	31.4286	37.1429	45.7143	48.5714	48.5714	48.5714	51.4286
168	168	MTD-4-25	0.47	0.33	0.3	0.28	0.27	0.24	0.24	0.23	0.23		29.7872	36.1702	40.4255	42.5532	48.9362	48.9362	51.0638	51.0638
176	176	MTD-4-26	0.46	0.35	0.33	0.3	0.28	0.26	0.25	0.24	0.22		23.913	28.2609	34.7826	39.1304	43.4783	45.6522	47.8261	52.1739
178	178	MTD-4-27	0.74	0.54	0.5	0.47	0.45	0.4	0.38	0.33	0.31		27.027	32.4324	36.4865	39.1892	45.9459	48.6486	55.4054	58.1081
191	191	MTD-4-28	0.51	0.36	0.19	0.26	0.22	0.22	0.16	0.16	0.15		29.4118	62.7451	49.0196	56.8627	56.8627	68.6275	68.6275	70.5882
105	105	MTD-4-3	0.4	0.38	0.33	0.25	0.23	0.2	0.2	0.19	0.16		5	17.5	37.5	42.5	50	50	52.5	60
223	223	MTD-4-30	0.58	0.37	0.35	0.33	0.31	0.3	0.3	0.24	0.24		36.2069	39.6552	43.1034	46.5517	48.2759	48.2759	58.6207	58.6207
225	225	MTD-4-31	0.33	0.24	0.23	0.25	0.19	0.19	0.18	0.17	0.15		27.2727	30.303	24.2424	42.4242	42.4242	45.4545	48.4848	54.5455
107	107	MTD-4-5	0.48	0.36	0.29	0.29	0.28	0.24	0.24	0.22	0.22		25	39.5833	39.5833	41.6667	50	50	54.1667	54.1667
108	108	MTD-4-6	0.38	0.27	0.26	0.23	0.23	0.21	0.19	0.19	0.18		28.9474	31.5789	39.4737	39.4737	44.7368	50	50	52.6316
109	109	MTD-4-7	0.5	0.32	0.29	0.26	0.25	0.24	0.22	0.21	0.2		36	42	48	50	52	56	58	60
111	111	MTD-4-9	0.44	0.27	0.24	0.21	0.21	0.19	0.17	0.14	0.14		38.6364	45.4545	52.2727	52.2727	56.8182	61.3636	68.1818	68.1818
161	161	MTD-5-10	0.51	0.33	0.29	0.24	0.24	0.23	0.19	0.18	0.15		35.2941	43.1373	52.9412	52.9412	54.902	62.7451	64.7059	70.5882
162	162	MTD-5-11	0.29	0.2	0.17	0.16	0.16	0.14	0.13	0.12	0.12		31.0345	41.3793	44.8276	44.8276	51.7241	55.1724	58.6207	58.6207
164	164	MTD-5-12	0.31	0.22	0.2	0.19	0.16	0.14	0.13	0.12	0.12		29.0323	35.4839	38.7097	48.3871	54.8387	58.0645	61.2903	61.2903
165	165	MTD-5-13	0.52	0.39	0.34	0.31	0.28	0.25	0.24	0.23	0.19		25	34.6154	40.3846	46.1538	51.9231	53.8462	55.7692	63.4615
177	177	MTD-5-14	0.62	0.42	0.37	0.32	0.28	0.26	0.25	0.2	0.17		32.2581	40.3226	48.3871	54.8387	58.0645	59.6774	67.7419	72.5806
185	185	MTD-5-15	0.39	0.3	0.25	0.23	0.21	0.2	0.2	0.19	0.18		23.0769	35.8974	41.0256	46.1538	48.7179	48.7179	51.2821	53.8462
126	126	MTD-5-6	0.37	0.26	0.24	0.22	0.21	0.21	0.21	0.21	0.17		29.7297	35.1351	40.5405	43.2432	43.2432	43.2432	43.2432	54.0541
127	127	MTD-5-7	0.54	0.4	0.36	0.36	0.35	0.31	0.31	0.3	0.27		25.9259	33.3333	33.3333	35.1852	42.5926	42.5926	44.4444	50
128	128	MTD-5-8	0.45	0.3	0.26	0.25	0.22	0.22	0.2	0.18	0.18		33.3333	42.2222	44.4444	51.1111	51.1111	55.5556	60	60
129	129	MTD-5-9	0.34	0.25	0.21	0.18	0.17	0.17	0.16	0.16	0.14		26.4706	38.2353	47.0588	50	50	52.9412	52.9412	58.8235
131	131	MTD-6-1	0.37	0.26	0.23	0.22	0.2	0.18	0.18	0.15	0.15		29.7297	37.8378	40.5405	45.9459	51.3514	51.3514	59.4595	59.4595
132	132	MTD-6-2	0.41	0.28	0.26	0.23	0.22	0.2	0.18	0.17	0.14		31.7073	36.5854	43.9024	46.3415	51.2195	56.0976	58.5366	65.8537
173	173	MTD-6-3	0.41	0.32	0.27	0.26	0.21	0.18	0.18	0.17	0.14		21.9512	34.1463	36.5854	48.7805	56.0976	56.0976	58.5366	65.8537
175	175	MTD-6-4	0.42	0.32	0.28	0.23	0.2	0.15	0.15	0.13	0.12		23.8095	33.3333	45.2381	52.381	64.2857	64.2857	69.0476	71.4286
193	193	MTD-6-5	0.34	0.24	0.22	0.18	0.17	0.16	0.16	0.15	0.15		29.4118	35.2941	47.0588	50	52.9412	52.9412	55.8824	55.8824
195	195	MTD-6-6	0.44	0.31	0.28	0.26	0.23	0.23	0.23	0.2	0.16		29.5455	36.3636	40.9091	47.7273	47.7273	47.7273	54.5455	63.6364
197	197	MTD-6-7	0.48	0.31	0.24	0.24	0.21	0.21	0.21	0.19	0.18		35.4167	50	50	56.25	56.25	56.25	60.4167	62.5
203	203	MTD-6-8	0.39	0.3	0.26	0.24	0.21	0.21	0.2	0.19	0.18		23.0769	33.3333	38.4615	46.1538	46.1538	48.7179	51.2821	53.8462
138	138	MTD-7-10	0.38	0.38	0.35	0.32	0.31	0.3	0.24	0.24	0.24		0	7.89474	15.7895	18.4211	21.0526	36.8421	36.8421	36.8421
139	139	MTD-7-11	0.27	0.19	0.14	0.12	0.09	0.09	0.09	0.08	0.07		29.6296	48.1481	55.5556	66.6667	66.6667	66.6667	70.3704	74.0741
140	140	MTD-7-12	0.6	0.43	0.39	0.37	0.34	0.34	0.3	0.28	0.25		28.3333	35	38.3333	43.3333	43.3333	50	53.3333	58.3333
159	159	MTD-7-13	0.33	0.24	0.22	0.18	0.17	0.15	0.13	0.1	0.1		27.2727	33.3333	45.4545	48.4848	54.5455	60.6061	69.697	69.697
184	184	MTD-7-14	0.5	0.37	0.33	0.28	0.25	0.23	0.21	0.18	0.17		26	34	44	50	54	58	64	66
189	189	MTD-7-15	0.28	0.17	0.13	0.12	0.12	0.11	0.13	0.11	0.09		39.2857	53.5714	57.1429	57.1429	60.7143	53.5714	60.7143	67.8571
194	194	MTD-7-16	0.42	0.31	0.28	0.26	0.24	0.16	0.16	0.16	0.16		26.1905	33.3333	38.0952	42.8571	61.9048	61.9048	61.9048	61.9048
196	196	MTD-7-17	0.3	0.21	0.21	0.19	0.18	0.15	0.15	0.15	0.14		30	30	36.6667	40	50	50	50	53.3333
198	198	MTD-7-18	0.29	0.2	0.17	0.17	0.15	0.15	0.14	0.13	0.13		31.0345	41.3793	41.3793	48.2759	48.2759	51.7241	55.1724	55.1724
202	202	MTD-7-19	0.42	0.29	0.27	0.23	0.22	0.22	0.18	0.18	0.16		30.9524	35.7143	45.2381	47.619	47.619	57.1429	57.1429	61.9048
204	204	MTD-7-20	0.29	0.22	0.2	0.19	0.19	0.19	0.18	0.16	0.15		24.1379	31.0345	34.4828	34.4828	34.4828	37.931	44.8276	48.2759
133	133	MTD-7-5	0.65	0.15	0.46	0.45	0.43	0.41	0.39	0.36	0.36		76.9231	29.2308	30.7692	33.8462	36.9231	40	44.6154	44.6154
136	136	MTD-7-8	0.42	0.28	0.24	0.23	0.2	0.18	0.18	0.18	0.17		33.3333	42.8571	45.2381	52.381	57.1429	57.1429	57.1429	59.5238
137	137	MTD-7-9	0.3	0.3	0.26	0.22	0.22	0.2	0.19	0.19	0.19		0	13.3333	26.6667	26.6667	33.3333	36.6667	36.6667	36.6667
130	130	MTD-8-1	0.55	0.4	0.37	0.33	0.32	0.3	0.3	0.27	0.24		27.2727	32.7273	40	41.8182	45.4545	45.4545	50.9091	56.3636
192	192	MTD-8-2	0.38	0.28	0.25	0.23	0.21	0.18	0.18	0.2	0.19		26.3158	34.2105	39.4737	44.7368	52.6316	52.6316	47.3684	50
141	141	MTD-9-1	0.4	0.28	0.25	0.19	0.18	0.14	0.14	0.13	0.12		30	37.5	52.5	55	65	65	67.5	70
150	150	MTD-9-10	0.44	0.25	0.24	0.2	0.17	0.15	0.14	0.12	0.12		43.1818	45.4545	54.5455	61.3636	65.9091	68.1818	72.7273	72.7273
151	151	MTD-9-11	0.23	0.16	0.15	0.12	0.11	0.1	0.09	0.09	0.09		30.4348	34.7826	47.8261	52.1739	56.5217	60.8696	60.8696	60.8696
152	152	MTD-9-12	0.33	0.24	0.22	0.21	0.17	0.12	0.12	0.12	0.1		27.2727	33.3333	36.3636	48.4848	63.6364	63.6364	63.6364	69.697
153	153	MTD-9-13	0.52	0.35	0.33	0.27	0.24	0.19	0.18	0.15	0.15		32.6923	36.5385	48.0769	53.8462	63.4615	65.3846	71.1538	71.1538
154	154	MTD-9-14	0.47	0.36	0.31	0.27	0.27	0.24	0.21	0.2	0.16		23.4043	34.0426	42.5532	42.5532	48.9362	55.3191	57.4468	65.9574
155	155	MTD-9-15	0.37	0.26	0.24	0.2	0.1	0.2	0.17	0.17	0.14		29.7297	35.1351	45.9459	72.973	45.9459	54.0541	54.0541	62.1622
156	156	MTD-9-16	0.51	0.37	0.32	0.29	0.28	0.26	0.25	0.24	0.2		27.451	37.2549	43.1373	45.098	49.0196	50.9804	52.9412	60.7843
157	157	MTD-9-17	0.39	0.29	0.27	0.26	0.24	0.24	0.21	0.21	0.2		25.641	30.7692	33.3333	38.4615	38.4615	46.1538	46.1538	48.7179
174	174	MTD-9-19	0.35	0.26	0.24	0.2	0.2	0.2	0.2	0.16	0.16		25.7143	31.4286	42.8571	42.8571	42.8571	42.8571	54.2857	54.2857
142	142	MTD-9-2	0.46	0.35	0.29	0.25	0.23	0.17	0.16	0.15	0.13		23.913	36.9565	45.6522	50	63.0435	65.2174	67.3913	71.7391
187	187	MTD-9-20	0.5	0.35	0.32	0.27	0.26	0.25	0.25	0.23	0.23		30	36	46	48	50	50	54	54
188	188	MTD-9-21	0.52	0.32	0.24	0.24	0.24	0.23	0.23	0.2	0.19		38.4615	53.8462	53.8462	53.8462	55.7692	55.7692	61.5385	63.4615
190	190	MTD-9-22	0.56	0.37	0.31	0.29	0.28	0.22	0.22	0.22	0.22		33.9286	44.6429	48.2143	50	60.7143	60.7143	60.7143	60.7143
224	224	MTD-9-23	0.43	0.31	0.28	0.26	0.23	0.2	0.18	0.16	0.15		27.907	34.8837	39.5349	46.5116	53.4884	58.1395	62.7907	65.1163
226	226	MTD-9-24	0.36	0.28	0.28	0.26	0.24	0.23	0.19	0.19	0.19		22.2222	22.2222	27.7778	33.3333	36.1111	47.2222	47.2222	47.2222
143	143	MTD-9-3	0.37	0.29	0.28	0.25	0.25	0.25	0.22	0.19	0.18		21.6216	24.3243	32.4324	32.4324	32.4324	40.5405	48.6486	51.3514
144	144	MTD-9-4	0.39	0.27	0.21	0.18	0.15	0.14	0.12	0.1	0.09		30.7692	46.1538	53.8462	61.5385	64.1026	69.2308	74.359	76.9231
145	145	MTD-9-5	0.39	0.28	0.25	0.24	0.2	0.2	0.19	0.17	0.14		28.2051	35.8974	38.4615	48.7179	48.7179	51.2821	56.4103	64.1026
146	146	MTD-9-6	0.5	0.36	0.32	0.29	0.27	0.24	0.21	0.18	0.17		28	36	42	46	52	58	64	66
147	147	MTD-9-7	0.14	0.1	0.08	0.08	0.07	0.06	0.05	0.05	0.05		28.5714	42.8571	42.8571	50	57.1429	64.2857	64.2857	64.2857
148	148	MTD-9-8	0.2	0.13	0.11	0.11	0.1	0.08	0.07	0.07	0.07		35	45	45	50	60	65	65	65
149	149	MTD-9-9	0.33	0.23	0.22	0.19	0.18	0.18	0.16	0.15	0.15		30.303	33.3333	42.4242	45.4545	45.4545	51.5152	54.5455	54.5455

## Sheet: Dehydrated for graph
Line No	0	1	2	3	4	5	6	7	8
GG-20	0.68	46.8276	50.5517	54.7241	61.1724	65.3448	70.7931	72.7931	79.4138
GG-20	0.58	44.8276	46.5517	51.7241	55.1724	60.3448	63.7931	63.7931	72.4138
GG-20	0.72	41.8462	41.4615	50.1538	58.8462	64.6923	71.3846	77.2308	80.0769
SD	0.072111	2.50678	4.55598	2.32212	3.02511	2.71804	4.22258	6.8467	4.24585
SE	0.0416333	1.44729	2.63039	1.34068	1.74655	1.56926	2.43791	3.95294	2.45134
MTD-10-1	0.52	28.8462	38.4615	46.1538	53.8462	57.6923	65.3846	69.2308	73.0769
MTD-10-2	0.33	21.2121	36.3636	45.4545	54.5455	66.6667	69.697	72.7273	75.7576
MTD-10-3	0.37	32.4324	37.8378	43.2432	43.2432	45.9459	48.6486	54.0541	59.4595
MTD-10-4	0.5	28	36	40	44	54	54	54	62
MTD-10-5	0.5	20	24	32	32	36	42	44	46
MTD-10-6	0.42	23.8095	33.3333	38.0952	38.0952	52.381	52.381	52.381	52.381
MTD10	0.405374	24.4928	30.1196	35.0488	38.452	44.201	47.3949	49.8217	52.7863
SD	0.0787401	4.83151	5.36659	5.32335	8.79879	10.4329	10.3952	10.9703	11.5335
SE	0.0321455	1.97245	2.1909	2.17325	3.59209	4.25923	4.24381	4.4786	4.70853
MTD-1-32	0.48	22.9167	31.25	37.5	43.75	45.8333	50	52.0833	56.25
MTD-1-33	0.44	22.7273	25	36.3636	36.3636	45.4545	45.4545	45.4545	50
MTD-1-34	0.28	32.1429	42.8571	46.4286	50	53.5714	57.1429	57.1429	60.7143
MTD-1-35	0.42	26.1905	38.0952	38.0952	42.8571	47.619	50	52.381	54.7619
MTD-1-36	0.61	37.7049	39.3443	45.9016	47.541	49.1803	55.7377	55.7377	60.6557
MTD-1-37	0.33	36.3636	42.4242	45.4545	45.4545	48.4848	57.5758	57.5758	57.5758
MTD-1-38	0.56	35.7143	44.6429	48.2143	51.7857	51.7857	64.2857	64.2857	64.2857
MTD-1-39	0.2	5	10	10	30	30	35	35	45
MTD-1-40	0.44	34.0909	40.9091	40.9091	47.7273	52.2727	59.0909	68.1818	68.1818
MTD-1-41	0.42	30.9524	38.0952	45.2381	45.2381	45.2381	47.619	54.7619	54.7619
MTD-1-42	0.33	27.2727	30.303	30.303	42.4242	48.4848	51.5152	54.5455	60.6061
MTD-1-43	0.39	28.2051	33.3333	35.8974	38.4615	38.4615	46.1538	28.2051	56.4103
MTD-1-44	0.57	35.0877	45.614	45.614	52.6316	52.6316	57.8947	59.6491	59.6491
MTD-1-45	0.6	41.6667	51.6667	53.3333	55	58.3333	63.3333	65	66.6667
MTD-1-46	0.63	38.0952	42.8571	49.2063	50.7937	52.381	60.3175	61.9048	66.6667
MTD-1-47	0.31	48.3871	58.0645	61.2903	67.7419	74.1935	77.4194	77.4194	83.871
MTD-1-48	0.49	38.7755	40.8163	48.9796	51.0204	53.0612	57.1429	57.1429	59.1837
MTD-1-49	0.43	41.8605	48.8372	51.1628	51.1628	51.1628	58.1395	65.1163	65.1163
MTD-1-50	0.73	34.2466	42.4658	46.5753	46.5753	53.4247	56.1644	56.9863	57.5342
MTD-1-51	0.3	40	43.3333	53.3333	53.3333	60	63.3333	60	66.6667
MTD-1-52	0.45	26.6667	35.5556	35.5556	35.5556	48.8889	48.8889	51.1111	60
MTD-1-53	0.36	30.5556	41.6667	50	50	58.3333	59.7222	61.1111	66.6667
MTD-1-54	0.45	40	46.6667	57.7778	64.4444	64.4444	66.6667	73.3333	73.3333
MTD1	0.444348	32.8097	39.7304	44.0493	47.8201	51.4453	56.026	57.1361	61.5025
SD	0.128552	8.89117	9.64724	10.5913	8.54095	8.6523	8.70278	10.8458	7.9938
SE	0.026805	1.85394	2.01159	2.20844	1.78091	1.80413	1.81465	2.26151	1.66682
MTD-2-46	0.44	40.9091	45.4545	47.7273	47.7273	56.8182	56.8182	59.0909	59.0909
MTD-2-47	0.21	38.0952	47.619	47.619	47.619	57.1429	61.9048	61.9048	71.4286
MTD-2-48	0.39	23.0769	33.3333	33.3333	33.3333	43.5897	48.7179	51.2821	51.2821
MTD-2-49	0.33	30.303	36.3636	45.4545	45.4545	54.5455	57.5758	60.6061	66.6667
MTD-2-50	0.33	36.3636	42.4242	42.4242	42.4242	51.5152	60.6061	60.6061	60.6061
MTD-2-51	0.51	27.451	31.3725	39.2157	39.2157	47.0588	47.0588	52.9412	52.9412
MTD-2-52	0.4	30	37.5	40	40	42.5	42.5	50	50
MTD-2-53	0.45	33.3333	35.5556	42.2222	47.5556	48.8889	51.1111	55.5556	57.7778
MTD-2-54	0.47	27.6596	34.0426	51.0638	51.0638	42.5532	57.4468	46.8085	46.8085
MTD-2-55	0.52	21.1538	30.7692	34.6154	42.3077	42.3077	50	51.9231	53.8462
MTD-2-56	0.48	31.25	35.4167	39.5833	43.75	47.9167	52.0833	52.0833	56.25
MTD-2-57	0.62	33.871	33.871	35.4839	43.5484	46.7742	46.7742	51.6129	59.6774
MTD-2-58	0.48	41.6667	41.6667	45.8333	50	52.0833	58.3333	58.3333	62.5
MTD-2-59	0.56	48.2143	48.2143	50	51.7857	55.3571	58.9286	62.5	62.5
MTD-2-60	0.6	38.3333	43.3333	46.6667	51.6667	51.6667	53.3333	56.6667	60
MTD-2-61	0.41	31.7073	46.3415	56.0976	60.9756	60.9756	65.8537	68.2927	73.1707
MTD-2-62	0.58	36.2069	41.3793	44.8276	51.7241	51.7241	53.4483	58.6207	58.6207
MTD-2-63	0.5	38	48	48	52	52	58	62	64
MTD-2-64	0.77	37.6623	45.4545	48.0519	50.6494	54.5455	54.5455	55.8442	59.7403
MTD-2-65	0.53	28.3019	35.8491	41.5094	45.283	45.283	49.0566	54.717	56.6038
MTD-2-66	0.82	30.4878	36.5854	41.4634	45.122	50	51.2195	56.0976	56.0976
MTD-2-67	0.3	26.6667	36.6667	36.6667	40	43.3333	46.6667	46.6667	46.6667
MTD-2-68	0.49	34.6939	44.898	46.9388	51.0204	53.0612	57.1429	59.1837	61.2245
MTD-2-69	0.74	40.5405	50	52.7027	54.0541	58.1081	63.5135	64.8649	70.2703
MTD-2-70	0.19	31.5789	47.3684	63.1579	68.4211	68.4211	68.4211	68.4211	73.6842
MTD-2-71	0.4	27.5	30	35	42.5	52.5	55	57.5	57.5
MTD-2-72	0.4	35	42.5	52.5	57.5	62.5	67.5	67.5	75
MTD-2-73	0.46	23.913	32.6087	41.3043	43.4783	43.4783	47.8261	67.3913	67.3913
MTD-2-75	0.44	36.3636	38.6364	43.1818	43.1818	45.4545	50	50	59.0909
MTD-2-76	0.39	35.8974	41.0256	41.0256	46.1538	41.0256	53.8462	56.4103	56.4103
MTD-2-77	0.56	21.4286	35.7143	44.6429	57.1429	67.8571	67.8571	71.4286	73.2143
MTD-2-78	0.58	39.6552	46.5517	50	51.7241	53.4483	58.6207	60.3448	67.2414
MTD2	0.479688	33.0402	39.8911	44.6348	48.0745	51.3886	55.3659	58.0374	60.8532
SD	0.141295	6.36721	5.93316	6.61062	6.99832	7.17843	6.752	6.44776	7.70241
SE	0.0249777	1.12557	1.04885	1.1686	1.23714	1.26898	1.1936	1.13981	1.36161
MTD-3-10	0.33	27.2727	33.3333	39.3939	45.4545	48.4848	51.5152	54.5455	60.6061
MTD-3-11	0.4	35	40	47.5	50	55	65	65	70
MTD-3-12	0.49	51.0204	59.1837	59.1837	61.2245	63.2653	69.3878	69.3878	69.3878
MTD-3-13	0.41	21.9512	29.2683	34.1463	41.4634	46.3415	48.7805	53.6585	56.0976
MTD-3-14	0.46	23.913	32.6087	36.9565	39.1304	41.3043	43.4783	52.1739	52.1739
MTD-3-15	0.33	39.3939	39.3939	48.4848	51.5152	45.4545	57.5758	66.6667	66.6667
MTD-3-16	0.32	34.375	37.5	40.625	37.5	53.125	53.125	53.125	53.125
MTD-3-17	0.44	31.8182	38.6364	43.1818	43.1818	56.8182	56.8182	56.8182	56.8182
MTD-3-18	0.42	40.4762	42.8571	47.619	47.619	57.1429	57.1429	57.1429	59.5238
MTD-3-19	0.39	23.0769	28.2051	35.8974	38.4615	43.5897	48.7179	48.7179	56.4103
MTD-3-20	0.58	39.6552	46.5517	50	53.4483	56.8966	62.069	63.7931	63.7931
MTD-3-21	0.53	32.0755	37.7358	43.3962	43.3962	47.1698	47.1698	50.9434	54.717
MTD-3-22	0.47	34.0426	42.5532	48.9362	48.9362	53.1915	55.3191	61.7021	61.7021
MTD-3-23	0.32	28.125	37.5	40.625	40.625	46.875	46.875	50	50
MTD-3-24	0.35	31.4286	37.1429	42.8571	48.5714	51.4286	51.4286	60	60
MTD-3-25	0.27	22.2222	40.7407	48.1481	51.8519	51.8519	55.5556	59.2593	59.2593
MTD-3-26	0.52	26.9231	36.5385	42.3077	48.0769	50	51.9231	53.8462	53.8462
MTD-3-27	0.48	27.0833	35.4167	41.6667	43.75	45.8333	50	52.0833	58.3333
MTD-3-28	0.35	34.2857	37.1429	45.7143	48.5714	51.4286	54.2857	57.1429	62.8571
MTD-3-29	0.24	29.1667	41.6667	54.1667	58.3333	62.5	62.5	62.5	75
MTD-3-30	0.66	22.7273	27.2727	33.3333	37.8788	39.3939	42.4242	43.9394	43.9394
MTD-3-31	1	22	33	40	43	48	50	53	53
MTD-3-32	0.52	28.8462	34.6154	40.3846	44.2308	44.2308	53.8462	53.8462	53.8462
MTD-3-33	0.53	18.8679	26.4151	32.0755	33.9623	39.6226	39.6226	39.6226	47.1698
MTD-3-34	0.71	29.5775	36.6197	43.662	50.7042	56.338	57.7465	59.1549	64.7887
MTD-3-35	0.41	26.8293	29.2683	36.5854	46.3415	51.2195	56.0976	58.5366	63.4146
MTD-3-37	0.51	23.5294	27.451	35.2941	39.2157	41.1765	49.0196	50.9804	54.902
MTD-3-38	0.44	25	34.0909	34.0909	38.6364	43.1818	45.4545	50	50
MTD-3-39	0.4	22.5	27.5	32.5	35	37.5	42.5	47.5	47.5
MTD-3-40	0.29	27.5862	37.931	48.2759	55.1724	58.6207	62.069	68.9655	68.9655
MTD-3-41	0.45	31.1111	37.7778	44.4444	48.8889	57.7778	60	62.2222	68.8889
MTD-3-42	0.33	15.1515	24.2424	30.303	36.3636	39.3939	42.4242	42.4242	45.4545
MTD-3-43	0.62	25.8065	30.6452	33.871	37.0968	41.9355	43.5484	46.7742	48.3871
MTD-3-44	0.48	31.25	35.4167	39.5833	45.8333	52.0833	52.0833	56.25	58.3333
MTD-3-45	0.31	22.5806	32.2581	35.4839	41.9355	41.9355	45.1613	54.8387	67.7419
MTD-3-46	0.33	24.2424	33.3333	33.3333	36.3636	45.4545	45.4545	45.4545	53.9394
MTD-3-47	0.44	31.8182	38.6364	40.9091	47.7273	52.2727	54.5455	56.8182	56.8182
MTD-3-48	0.21	9.52381	28.5714	42.8571	47.619	52.381	61.9048	61.9048	61.9048
MTD-3-49	0.34	29.4118	35.2941	44.1176	50	50	52.9412	58.8235	58.8235
MTD-3-50	0.33	30.303	30.303	36.3636	45.4545	48.4848	51.5152	66.6667	66.6667
MTD-3-51	0.45	17.7778	20	24.4444	26.6667	33.3333	35.5556	35.5556	35.5556
MTD-3-52	0.36	19.4444	25	30.5556	33.3333	33.3333	36.1111	41.6667	44.4444
MTD-3-53	0.43	20.9302	25.5814	32.5581	37.2093	51.1628	53.4884	53.4884	53.4884
MTD-3-54	0.41	36.5854	41.4634	43.9024	48.7805	48.7805	51.2195	51.2195	53.6585
MTD-3-55	0.47	25.5319	31.9149	36.1702	40.4255	40.4255	48.9362	51.0638	55.3191
MTD-3-56	0.53	24.5283	30.1887	32.0755	37.7358	39.6226	43.3962	54.717	54.717
MTD-3-57	0.56	21.4286	28.5714	30.3571	37.5	41.0714	48.2143	48.2143	50
MTD-3-58	0.26	15.3846	34.6154	42.3077	46.1538	53.8462	53.8462	57.6923	61.5385
MTD-3-59	0.44	25	31.8182	36.3636	45.4545	52.2727	56.8182	59.0909	61.3636
MTD-3-6	0.44	63.6364	47.7273	47.7273	52.2727	56.8182	59.0909	63.6364	63.6364
MTD-3-60	0.51	29.4118	37.2549	39.2157	45.098	47.0588	54.902	54.902	56.8627
MTD-3-61	0.37	24.3243	35.1351	37.8378	45.9459	48.6486	54.0541	59.4595	62.1622
MTD-3-62	0.27	29.6296	37.037	40.7407	40.7407	44.4444	48.1481	51.8519	55.5556
MTD-3-63	0.35	31.4286	34.2857	48.5714	60	62.8571	65.7143	65.7143	68.5714
MTD-3-64	0.52	21.1538	36.5385	38.4615	46.1538	51.9231	53.8462	61.5385	65.3846
MTD-3-65	0.62	30.6452	38.7097	43.5484	50	50	61.2903	62.9032	67.7419
MTD-3-66	0.33	21.2121	30.303	30.303	36.3636	36.3636	42.4242	45.4545	51.5152
MTD-3-67	0.46	32.6087	39.1304	43.4783	47.8261	47.8261	52.1739	54.3478	54.3478
MTD-3-68	0.22	27.2727	36.3636	40.9091	40.9091	40.9091	45.4545	45.4545	54.5455
MTD-3-69	0.33	27.2727	36.3636	45.4545	45.4545	48.4848	54.5455	54.5455	60.6061
MTD-3-7	0.41	34.1463	36.5854	41.4634	46.3415	46.3415	51.2195	53.6585	53.6585
MTD-3-70	0.36	38.8889	44.4444	47.2222	47.2222	58.3333	61.1111	61.1111	77.7778
MTD-3-71	0.37	35.1351	37.8378	45.9459	54.0541	59.4595	59.4595	64.8649	72.973
MTD-3-72	0.27	40.7407	44.4444	59.2593	59.2593	59.2593	59.2593	62.963	66.6667
MTD-3-73	0.42	28.5714	38.0952	45.2381	47.619	54.7619	61.9048	64.2857	64.2857
MTD-3-74	0.36	30.5556	38.8889	47.2222	52.7778	58.3333	58.3333	61.1111	63.8889
MTD-3-75	0.52	32.6923	38.4615	40.3846	40.3846	50	55.7692	57.6923	59.6154
MTD-3-76	0.21	38.0952	42.8571	47.619	52.381	14.2857	61.9048	66.6667	71.4286
MTD-3-77	0.51	35.2941	47.0588	52.9412	56.8627	84.3137	68.6275	70.5882	76.4706
MTD-3-78	0.51	33.3333	41.1765	43.1373	47.0588	50.9804	54.902	54.902	54.902
MTD-3-79	0.44	20.4545	36.3636	40.9091	45.4545	47.7273	52.2727	56.8182	61.3636
MTD-3-8	0.6	31.6667	43.3333	43.3333	45	46.6667	48.3333	51.6667	51.6667
MTD-3-80	0.27	29.6296	33.3333	40.7407	44.4444	48.1481	48.1481	59.2593	62.963
MTD-3-81	0.57	22.807	31.5789	33.3333	42.1053	42.1053	50.8772	52.6316	56.1404
MTD-3-82	0.51	25.4902	33.3333	41.1765	45.098	47.0588	49.0196	54.902	54.902
MTD-3-83	0.42	26.1905	33.3333	38.0952	45.2381	50	52.381	57.1429	64.2857
MTD-3-84	0.42	21.4286	33.3333	40.4762	47.619	52.381	52.381	57.1429	59.5238
MTD-3-9	0.53	30.1887	35.8491	43.3962	43.3962	49.0566	52.8302	54.717	54.717
MTD3	0.428718	28.6216	35.6786	41.0917	45.242	48.9372	52.7563	55.9086	58.8852
SD	0.126217	7.85016	6.15475	6.58711	6.56392	8.76551	7.00523	7.11538	7.90509
SE	0.0142913	0.888855	0.696889	0.745843	0.743218	0.992499	0.793186	0.805658	0.895076
MTD-4-11	0.47	38.2979	48.9362	53.1915	55.3191	55.3191	59.5745	63.8298	63.8298
MTD-4-12	0.52	38.4615	44.2308	53.8462	53.8462	55.7692	59.6154	59.6154	63.4615
MTD-4-13	0.36	36.1111	44.4444	61.1111	61.1111	61.1111	61.1111	72.2222	75
MTD-4-14	0.61	39.3443	44.2623	55.7377	59.0164	59.0164	60.6557	67.2131	67.2131
MTD-4-15	0.27	7.40741	33.3333	37.037	48.1481	48.1481	48.1481	62.963	66.6667
MTD-4-16	0.43	37.2093	37.2093	37.2093	44.186	46.5116	55.814	51.1628	58.1395
MTD-4-17	0.46	28.2609	39.1304	41.3043	41.3043	41.3043	58.6957	50	56.5217
MTD-4-18	0.43	20.9302	27.907	32.5581	41.8605	51.1628	65.1163	65.1163	65.1163
MTD-4-19	0.35	31.4286	37.1429	37.1429	45.7143	45.7143	51.4286	51.4286	60
MTD-4-20	0.52	32.6923	40.3846	44.2308	46.1538	50	53.8462	53.8462	57.6923
MTD-4-22	0.58	32.7586	37.931	41.3793	43.1034	48.28	48.2759	51.7241	53.4483
MTD-4-24	0.35	31.4286	31.4286	37.1429	45.7143	48.5714	48.5714	48.5714	51.4286
MTD-4-25	0.47	29.7872	36.1702	40.4255	42.5532	48.9362	48.9362	51.0638	51.0638
MTD-4-26	0.46	23.913	28.2609	34.7826	39.1304	43.4783	45.6522	47.8261	52.1739
MTD-4-27	0.74	27.027	32.4324	36.4865	39.1892	45.9459	48.6486	55.4054	58.1081
MTD-4-28	0.51	29.4118	62.7451	49.0196	56.8627	56.8627	68.6275	68.6275	70.5882
MTD-4-3	0.4	5	17.5	37.5	42.5	50	50	52.5	60
MTD-4-30	0.58	36.2069	39.6552	43.1034	46.5517	48.2759	48.2759	58.6207	58.6207
MTD-4-31	0.33	27.2727	30.303	24.2424	42.4242	42.4242	45.4545	48.4848	54.5455
MTD-4-5	0.48	25	39.5833	39.5833	41.6667	50	50	54.1667	54.1667
MTD-4-6	0.38	28.9474	31.5789	39.4737	39.4737	44.7368	50	50	52.6316
MTD-4-7	0.5	36	42	48	50	52	56	58	60
MTD-4-9	0.44	38.6364	45.4545	52.2727	52.2727	56.8182	61.3636	68.1818	68.1818
MTD4	0.462609	29.6319	37.9141	42.4687	46.874	50.0168	54.0787	56.9813	59.939
SD	0.14658	10.2926	11.1034	13.308	13.6158	13.8013	15.2474	16.4207	17.0066
SE	0.031251	2.19438	2.36726	2.83727	2.9029	2.94245	3.25076	3.5009	3.62581
MTD-5-10	0.51	35.2941	43.1373	52.9412	52.9412	54.902	62.7451	64.7059	70.5882
MTD-5-11	0.29	31.0345	41.3793	44.8276	44.8276	51.7241	55.1724	58.6207	58.6207
MTD-5-12	0.31	29.0323	35.4839	38.7097	48.3871	54.8387	58.0645	61.2903	61.2903
MTD-5-13	0.52	25	34.6154	40.3846	46.1538	51.9231	53.8462	55.7692	63.4615
MTD-5-14	0.62	32.2581	40.3226	48.3871	54.8387	58.0645	59.6774	67.7419	72.5806
MTD-5-15	0.39	23.0769	35.8974	41.0256	46.1538	48.7179	48.7179	51.2821	53.8462
MTD-5-6	0.37	29.7297	35.1351	40.5405	43.2432	43.2432	43.2432	43.2432	54.0541
MTD-5-7	0.54	25.9259	33.3333	33.3333	35.1852	42.5926	42.5926	44.4444	50
MTD-5-8	0.45	33.3333	42.2222	44.4444	51.1111	51.1111	55.5556	60	60
MTD-5-9	0.34	26.4706	38.2353	47.0588	50	50	52.9412	52.9412	58.8235
MTD5	0.434	29.1155	37.9762	43.1653	47.2842	50.7117	53.2556	56.0039	60.3265
SD	0.110675	3.95079	3.54769	5.55891	5.61362	4.9158	6.65303	8.11347	7.14512
SE	0.0349984	1.24935	1.12188	1.75788	1.77518	1.55451	2.10387	2.5657	2.25949
MTD-6-1	0.37	29.7297	37.8378	40.5405	45.9459	51.3514	51.3514	59.4595	59.4595
MTD-6-2	0.41	31.7073	36.5854	43.9024	46.3415	51.2195	56.0976	58.5366	65.8537
MTD-6-3	0.41	21.9512	34.1463	36.5854	48.7805	56.0976	56.0976	58.5366	65.8537
MTD-6-4	0.42	23.8095	33.3333	45.2381	52.381	64.2857	64.2857	69.0476	71.4286
MTD-6-5	0.34	29.4118	35.2941	47.0588	50	52.9412	52.9412	55.8824	55.8824
MTD-6-6	0.44	29.5455	36.3636	40.9091	47.7273	47.7273	47.7273	54.5455	63.6364
MTD-6-7	0.48	35.4167	50	50	56.25	56.25	56.25	60.4167	62.5
MTD-6-8	0.39	23.0769	33.3333	38.4615	46.1538	46.1538	48.7179	51.2821	53.8462
MTD6	0.4075	28.0811	37.1117	42.837	49.1975	53.2533	54.1836	58.4633	62.3075
SD	0.0426782	4.69736	5.45267	4.52376	3.60248	5.70181	5.2749	5.21574	5.74625
SE	0.015089	1.66077	1.92781	1.59939	1.27367	2.01589	1.86496	1.84404	2.03161
MTD-7-10	0.38	0	7.89474	15.7895	18.4211	21.0526	36.8421	36.8421	36.8421
MTD-7-11	0.27	29.6296	48.1481	55.5556	66.6667	66.6667	66.6667	70.3704	74.0741
MTD-7-12	0.6	28.3333	35	38.3333	43.3333	43.3333	50	53.3333	58.3333
MTD-7-13	0.33	27.2727	33.3333	45.4545	48.4848	54.5455	60.6061	69.697	69.697
MTD-7-14	0.5	26	34	44	50	54	58	64	66
MTD-7-15	0.28	39.2857	53.5714	57.1429	57.1429	60.7143	53.5714	60.7143	67.8571
MTD-7-16	0.42	26.1905	33.3333	38.0952	42.8571	61.9048	61.9048	61.9048	61.9048
MTD-7-17	0.3	30	30	36.6667	40	50	50	50	53.3333
MTD-7-18	0.29	31.0345	41.3793	41.3793	48.2759	48.2759	51.7241	55.1724	55.1724
MTD-7-19	0.42	30.9524	35.7143	45.2381	47.619	47.619	57.1429	57.1429	61.9048
MTD-7-20	0.29	24.1379	31.0345	34.4828	34.4828	34.4828	37.931	44.8276	48.2759
MTD-7-5	0.65	76.9231	29.2308	30.7692	33.8462	36.9231	40	44.6154	44.6154
MTD-7-8	0.42	33.3333	42.8571	45.2381	52.381	57.1429	57.1429	57.1429	59.5238
MTD-7-9	0.3	0	13.3333	26.6667	26.6667	33.3333	36.6667	36.6667	36.6667
MTD7	0.389286	28.7924	33.4879	39.6294	43.5841	47.8567	51.2999	54.4593	56.7286
SD	0.121811	17.8797	12.0045	10.8612	12.4282	12.8251	9.9486	10.8259	11.6781
SE	0.0325554	4.77856	3.20834	2.90278	3.32158	3.42764	2.65887	2.89336	3.12109
MTD-8-1	0.55	27.2727	32.7273	40	41.8182	45.4545	45.4545	50.9091	56.3636
MTD-8-2	0.38	26.3158	34.2105	39.4737	44.7368	52.6316	52.6316	47.3684	50
MTD8	0.465	26.7943	33.4689	39.7368	43.2775	49.0431	49.0431	49.1388	53.1818
SD	0.120208	0.676657	1.04882	0.372161	2.0638	5.07493	5.07493	2.50363	4.49977
SE	0.085	0.478469	0.741627	0.263158	1.45933	3.58852	3.58852	1.77033	3.18182
MTD-9-1	0.4	30	37.5	52.5	55	65	65	67.5	70
MTD-9-10	0.44	43.1818	45.4545	54.5455	61.3636	65.9091	68.1818	72.7273	72.7273
MTD-9-11	0.23	30.4348	34.7826	47.8261	52.1739	56.5217	60.8696	60.8696	60.8696
MTD-9-12	0.33	27.2727	33.3333	36.3636	48.4848	63.6364	63.6364	63.6364	69.697
MTD-9-13	0.52	32.6923	36.5385	48.0769	53.8462	63.4615	65.3846	71.1538	71.1538
MTD-9-14	0.47	23.4043	34.0426	42.5532	42.5532	48.9362	55.3191	57.4468	65.9574
MTD-9-15	0.37	29.7297	35.1351	45.9459	72.973	45.9459	54.0541	54.0541	62.1622
MTD-9-16	0.51	27.451	37.2549	43.1373	45.098	49.0196	50.9804	52.9412	60.7843
MTD-9-17	0.39	25.641	30.7692	33.3333	38.4615	38.4615	46.1538	46.1538	48.7179
MTD-9-19	0.35	25.7143	31.4286	42.8571	42.8571	42.8571	42.8571	54.2857	54.2857
MTD-9-2	0.46	23.913	36.9565	45.6522	50	63.0435	65.2174	67.3913	71.7391
MTD-9-20	0.5	30	36	46	48	50	50	54	54
MTD-9-21	0.52	38.4615	53.8462	53.8462	53.8462	55.7692	55.7692	61.5385	63.4615
MTD-9-22	0.56	33.9286	44.6429	48.2143	50	60.7143	60.7143	60.7143	60.7143
MTD-9-23	0.43	27.907	34.8837	39.5349	46.5116	53.4884	58.1395	62.7907	65.1163
MTD-9-24	0.36	22.2222	22.2222	27.7778	33.3333	36.1111	47.2222	47.2222	47.2222
MTD-9-3	0.37	21.6216	24.3243	32.4324	32.4324	32.4324	40.5405	48.6486	51.3514
MTD-9-4	0.39	30.7692	46.1538	53.8462	61.5385	64.1026	69.2308	74.359	76.9231
MTD-9-5	0.39	28.2051	35.8974	38.4615	48.7179	48.7179	51.2821	56.4103	64.1026
MTD-9-6	0.5	28	36	42	46	52	58	64	66
MTD-9-7	0.14	28.5714	42.8571	42.8571	50	57.1429	64.2857	64.2857	64.2857
MTD-9-8	0.2	35	45	45	50	60	65	65	65
MTD-9-9	0.33	30.303	33.3333	42.4242	45.4545	45.4545	51.5152	54.5455	54.5455
MTD9	0.398261	29.3228	36.8851	43.7037	49.0716	52.9881	56.9284	60.0728	62.6442
SD	0.106586	5.04359	7.0603	6.96574	8.88389	9.75432	8.29495	7.90332	7.93145
SE	0.0222246	1.05166	1.47218	1.45246	1.85242	2.03392	1.72962	1.64796	1.65382

## Sheet: RWC for graph
Line No	RWC
GG-20	79.4118
MTD-10-1	82.6923
MTD-10-2	84.6154
MTD-10-3	92.8571
MTD-10-4	53.5714
MTD-10-5	90.4762
MTD-10-6	87.8788
MTD10	81.6433
SD	13.201
SE	4.9895
MTD-1-32	90.2439
MTD-1-33	90.625
MTD-1-34	90.625
MTD-1-35	94.7368
MTD-1-36	80.303
MTD-1-37	82.0513
MTD-1-38	94
MTD-1-39	76.1905
MTD-1-40	81.8182
MTD-1-41	92.8571
MTD-1-42	92.5
MTD-1-43	76.5625
MTD-1-44	94.4444
MTD-1-45	92
MTD-1-46	87.0968
MTD-1-47	92.8571
MTD-1-48	93.0233
MTD-1-49	85.1852
MTD-1-50	88.8889
MTD-1-51	94.2857
MTD-1-52	88
MTD-1-53	93.0233
MTD-1-54	89.2857
MTD10	88.7219
SD	5.7107
SE	1.21752
MTD-2-46	90.2439
MTD-2-47	82.6087
MTD-2-48	90.4762
MTD-2-49	96.5517
MTD-2-50	85.2941
MTD-2-51	91.8919
MTD-2-52	80.7692
MTD-2-53	92.5
MTD-2-54	97.3684
MTD-2-55	90.2439
MTD-2-56	86.6667
MTD-2-57	90.9091
MTD-2-58	86.2069
MTD-2-59	91.4821
MTD-2-60	86.4407
MTD-2-61	93.75
MTD-2-62	92.8571
MTD-2-63	89.1304
MTD-2-64	92.8571
MTD-2-65	89.5522
MTD-2-66	86.6667
MTD-2-67	80.4348
MTD-2-68	87.234
MTD-2-69	94.6429
MTD-2-70	92.5926
MTD-2-71	90.2439
MTD-2-72	85.3659
MTD-2-73	72.7273
MTD-2-75	92.5926
MTD-2-76	92
MTD-2-77	86.4865
MTD-2-78	95.6522
MTD2	89.2012
SD	5.18971
SE	0.932099
MTD-3-10	90.3226
MTD-3-11	88.6364
MTD-3-12	93.9394
MTD-3-13	84.2105
MTD-3-14	87.0968
MTD-3-15	97.3684
MTD-3-16	94.4444
MTD-3-17	88.345
MTD-3-18	94.8718
MTD-3-19	89.6552
MTD-3-20	86.2069
MTD-3-21	90.4762
MTD-3-22	92.5926
MTD-3-23	95.4545
MTD-3-24	88.6364
MTD-3-25	91.3043
MTD-3-26	94.1176
MTD-3-27	87.0968
MTD-3-28	87.8788
MTD-3-29	92.8571
MTD-3-30	93.1818
MTD-3-31	90.625
MTD-3-32	86.3636
MTD-3-33	93.1034
MTD-3-34	90.4762
MTD-3-35	90
MTD-3-37	85.7143
MTD-3-38	88.8889
MTD-3-39	83.7209
MTD-3-40	92.5926
MTD-3-41	89.4737
MTD-3-42	93.75
MTD-3-43	88.8889
MTD-3-44	88.8889
MTD-3-45	92.5926
MTD-3-46	93.4783
MTD-3-47	85.7143
MTD-3-48	94.4444
MTD-3-49	92.1569
MTD-3-50	93.1818
MTD-3-51	89.1892
MTD-3-52	95.5556
MTD-3-53	93.5484
MTD-3-54	87.8788
MTD-3-55	93.9394
MTD-3-56	91.1765
MTD-3-57	90.4762
MTD-3-58	95.2381
MTD-3-59	92.6829
MTD-3-6	85
MTD-3-60	94.2857
MTD-3-61	76.6667
MTD-3-62	83.7209
MTD-3-63	89.0625
MTD-3-64	94.5946
MTD-3-65	88.0952
MTD-3-66	87.0968
MTD-3-67	94.7368
MTD-3-68	100
MTD-3-69	75.6757
MTD-3-7	88.4615
MTD-3-70	81.8182
MTD-3-71	89.7436
MTD-3-72	92.3077
MTD-3-73	94.5946
MTD-3-74	88.8889
MTD-3-75	94.8718
MTD-3-76	93.5484
MTD-3-77	93.5484
MTD-3-78	93.4783
MTD-3-79	88.4615
MTD-3-8	87.8788
MTD-3-80	92
MTD-3-81	96.2963
MTD-3-82	88.3721
MTD-3-83	88.8889
MTD-3-84	83.3333
MTD-3-9	88.2353
Mean	90.3346
SD	4.28609
SE	0.488446
MTD-4-11	88.2353
MTD-4-12	89.6552
MTD-4-13	90.9091
MTD-4-14	88.2353
MTD-4-15	96.4286
MTD-4-16	83.871
MTD-4-17	90.9091
MTD-4-18	87.8788
MTD-4-19	90.3226
MTD-4-20	85
MTD-4-22	88.4615
MTD-4-24	84.8485
MTD-4-25	83.6364
MTD-4-26	85.4167
MTD-4-27	90.566
MTD-4-28	93.1034
MTD-4-3	87.234
MTD-4-30	85.7143
MTD-4-31	93.5484
MTD-4-5	93.5484
MTD-4-6	86.2069
MTD-4-7	90.3846
MTD-4-9	85.3659
MTD4	88.8575
SD	3.60725
SE	1.36341
MTD-5-10	90.9091
MTD-5-11	85.3659
MTD-5-12	88.2353
MTD-5-13	86.6667
MTD-5-14	86.4865
MTD-5-15	87.5
MTD-5-6	93.75
MTD-5-7	86.6667
MTD-5-8	91.3043
MTD-5-9	91.8919
Mean	88.8776
SD	2.84759
SE	0.949196
MTD-6-1	100
MTD-6-2	86.3636
MTD-6-3	85.7143
MTD-6-4	85.1064
MTD-6-5	78.125
MTD-6-6	82.7586
MTD-6-7	90.9091
MTD-6-8	89.7436
MTD6	87.3401
SD	6.47282
SE	2.28849
MTD-7-10	94.7368
MTD-7-11	87.5
MTD-7-12	88.8889
MTD-7-13	92.8571
MTD-7-14	82.9787
MTD-7-15	90.9091
MTD-7-16	88.3721
MTD-7-17	97.0588
MTD-7-18	82.3529
MTD-7-19	91.8919
MTD-7-20	88.2353
MTD-7-5	80
MTD-7-8	90.6977
MTD-7-9	85.1064
MTD7	88.6847
SD	4.85222
SE	1.34576
MTD-8-1	90.6977
MTD-8-2	96.875
MTD8	93.7863
SD	4.36803
SE	3.08866
MTD-9-1	95.8333
MTD-9-10	86.6667
MTD-9-11	91.6667
MTD-9-12	85.7143
MTD-9-13	88.2353
MTD-9-14	93.5484
MTD-9-15	92.3077
MTD-9-16	91.8919
MTD-9-17	89.4737
MTD-9-19	86.4865
MTD-9-2	90.2439
MTD-9-20	76.9231
MTD-9-21	87.8049
MTD-9-22	93.1818
MTD-9-23	100
MTD-9-24	82.5
MTD-9-3	83.3333
MTD-9-4	93.5484
MTD-9-5	87.8049
MTD-9-6	100
MTD-9-7	90
MTD-9-8	92.3077
MTD-9-9	88.8889
MTD9	89.9287
SD	5.28321
SE	1.12638

## Sheet: Sheet2
Line No	RWC			Line No	RWC
GG-20	79.41			GG-20	79.41	1.52	3.99	1.93	1.49	1.36	1.95	2.29	1.35	3.09	1.13	1.22
MTD1	81.64			MTD1	81.64
SD	13.2			MTD2	89.2
SE	4.99			MTD3	90.33
MTD10	88.72			MTD4	88.86
SD	5.71			MTD5	88.88
SE	1.22			MTD6	87.34
MTD2	89.2			MTD7	88.68
SD	5.19			MTD8	93.79
SE	0.93			MTD9	89.93
Mean	90.33			MTD10	88.72
SD	4.29
SE	0.49
MTD4	88.86
SD	3.61
SE	1.36
Mean	88.88
SD	2.85
SE	0.95
MTD6	87.34
SE	2.29
MTD7	88.68
SD	4.85
SE	1.35		Line No	1	2	3	4	5	6	7	8
MTD8	93.79	1	GG-20	44.83	46.55	51.72	55.17	60.34	63.79	63.79	72.41			1	1.45	2.63039	1.34068	1.74655	1.56926	2.43791	3.95294	2.45134
SD	4.37	2	MTD1	28.45	36.08	42.38	45.84	53.29	56.56	58.6	63.01			2	1.97245	2.1909	2.17325	3.59209	4.25923	4.24381	4.4786	4.70853
SE	3.09	3	MTD2	33.04	39.89	44.63	48.07	51.39	55.37	58.04	60.85			3	1.85394	2.01159	2.20844	1.78091	1.80413	1.81465	2.26151	1.66682
MTD9	89.93	4	MTD3	28.62	35.68	41.09	45.24	48.94	52.76	55.91	58.89			4	1.12557	1.04885	1.1686	1.23714	1.26898	1.1936	1.13981	1.36161
SD	5.28	5	MTD4	29.63	37.91	42.47	46.87	50.02	54.08	56.98	59.94			5	0.888855	0.696889	0.745843	0.743218	0.992499	0.793186	0.805658	0.895076
SE	1.13	6	MTD5	29.12	37.98	43.17	47.28	50.71	53.26	56	60.33			6	1.24935	1.12188	1.75788	1.77518	1.55451	2.10387	2.5657	2.25949
		7	MTD6	28.08	37.11	42.84	49.2	53.25	54.18	58.46	62.31			7	1.66077	1.92781	1.59939	1.27367	2.01589	1.86496	1.84404	2.03161
		8	MTD7	28.79	33.49	39.63	43.58	47.86	51.3	54.46	56.73			8	4.77856	3.20834	2.90278	3.32158	3.42764	2.65887	2.89336	3.12109
		9	MTD8	26.79	33.47	39.74	43.28	49.04	49.04	49.14	53.18			9	0.478469	0.741627	0.263158	1.45933	3.58852	3.58852	1.77033	3.18182
		10	MTD9	29.32	36.89	43.7	49.07	52.99	56.93	60.07	62.64			10	1.05166	1.47218	1.45246	1.85242	2.03392	1.72962	1.64796	1.65382

## Sheet: Data for Table 3
	Water Deficit Stress
Transgenic line	R1	R2	R3	Mean	SD	SE		LSD
MTD1	2.6664	2.7636	3.644	3.02467	0.538556	0.310944	d	0.896382	4	6	4
MTD2	2.5416	3.9964	3.3652	3.30107	0.729517	0.421199	cd		6	4	2
MTD3	5.5436	4.1772	4.49	4.73693	0.715887	0.41333	a		6	2	9
MTD4	4.6	4.1	5.24	4.64667	0.571431	0.329925	a		6	1	4
MTD5	3.6576	3.922	3.58	3.71987	0.179301	0.103523	bcd		6	2	8
MTD6	4.1	4.7	3.98	4.26	0.385746	0.222717	ab		1	7	8
MTD7	3.356	3.47	3.92	3.582	0.298215	0.172179	bc		6	7	2		Water Deficit Stress		Well watered
MTD8	3.38	4.28	4.71	4.12333	0.6787	0.391859	abc		8	8	1	Transgenic line	Mean		Mean
GG 20 (WT)	0	0	0	0	0	0						MTD1	3.02467	0.310944	2.2516	0.295672
												MTD2	3.30107	0.421199	1.81253	0.218604
												MTD3	4.73693	0.41333	2.98013	0.378222
	Well watered											MTD4	4.64667	0.329925	2.73667	0.287546
Transgenic line	R1	R2	R3	Mean				LSD				MTD5	3.71987	0.103523	2.83253	0.159143
MTD1	1.7712	2.1932	2.7904	2.2516	0.512104	0.295672	ab	0.797112	2	2	4	MTD6	4.26	0.222717	2.84	0.135281
MTD2	1.7136	1.4932	2.2308	1.81253	0.378622	0.218604	b		6	2	8	MTD7	3.582	0.172179	2.71	0.29264
MTD3	2.2484	3.512	3.18	2.98013	0.655081	0.378222	a		4	2	8	MTD8	4.12333	0.391859	2.73	0.291041
MTD4	3.2	2.21	2.8	2.73667	0.498029	0.287546	a		2	1	8	GG 20 (WT)	0	0	0	0
MTD5	3.0124	2.5152	2.97	2.83253	0.275635	0.159143	a		4	2	7
MTD6	2.72	2.69	3.11	2.84	0.234307	0.135281	a		2	9	1	LSD	0.896382		0.797112
MTD7	2.14	3.11	2.88	2.71	0.506853	0.29264	a		4	1	8
MTD8	2.18	2.84	3.17	2.73	0.504083	0.291041	a		8	4	7
GG 20 (WT)	0	0	0	0	0	0
								1	6	5.33333	0.666667	0.444444	0.0833333
								2	11	5.33333	5.66667	32.1111	6.02083
								3	0	5.33333	-5.33333	28.4444	5.33333
								4	9	5.33333	3.66667	13.4444	2.52083
								5	0	5.33333	-5.33333	28.4444	5.33333
								6	7	5.33333	1.66667	2.77778	0.520833
								7	4	5.33333	-1.33333	1.77778	0.333333
								8	9	5.33333	3.66667	13.4444	2.52083
								9	2	5.33333	-3.33333	11.1111	2.08333
									48				24.75
													p=0.001713

## Sheet: Data for Fig 5
	Time	R1	R2	R3	Mean	SD	SE	LSD
GG 20	0	0.68	0.58	0.72	0.66	0.072111	0.0416345	0.130344	a			0	1	2	3	4	5	6	7	8
MTD1	0	0.48	0.44	0.38	0.433333	0.0503322	0.0290602		b		GG 20	0.66	44.5004	46.1883	52.2007	58.397	63.4607	69.3236	72.2723	78.3015		8	8	2		1	25	25.7778	-0.777778	0.604938	0.0234674
MTD2	0	0.44	0.31	0.39	0.38	0.0655744	0.0378605		b		MTD1	0.433333	25.9289	33.0357	40.0974	43.3712	48.2864	50.8658	51.5602	55.6548		8	4	8		2	22	25.7778	-3.77778	14.2716	0.55364
MTD3	0	0.33	0.4	0.49	0.406667	0.0802081	0.0463095		b		MTD2	0.38	37.3604	42.1356	46.2266	42.8932	52.5169	59.147	57.4259	57.2672		4	1	9		3	23	25.7778	-2.77778	7.71605	0.29933
MTD4	0	0.47	0.52	0.36	0.45	0.0818535	0.0472595		b		MTD3	0.406667	47.7644	40.839	52.0259	52.2263	55.5834	65.301	66.3111	66.6646		3	4	9		4	26	25.7778	0.222222	0.0493827	0.00191571
MTD5	0	0.51	0.49	0.31	0.436667	0.110151	0.0635978		b		MTD4	0.45	37.6235	45.8705	56.0496	56.7588	57.3998	60.1003	68.5558	67.4304		7	2	6		5	43	25.7778	17.2222	296.605	11.5062
MTD6	0	0.37	0.41	0.41	0.396667	0.023094	0.0133337		b		MTD5	0.436667	31.787	40.0001	42.1595	48.7186	53.8216	58.6607	61.539	60.1664		1	9	1		6	18	25.7778	-7.77778	60.4938	2.34674
MTD7	0	0.38	0.47	0.6	0.483333	0.110604	0.0638594		b		MTD6	0.396667	27.7961	36.1898	40.3428	47.0226	52.8895	54.5155	58.8442	63.7223		7	1	1		7	23	25.7778	-2.77778	7.71605	0.29933
MTD8	0	0.55	0.48	0.47	0.5	0.043589	0.0251669		b		MTD7	0.483333	28.581	43.681	43.2261	59.4737	53.6842	57.8363	66.8486	59.7498		8	7	6		8	25	25.7778	-0.777778	0.604938	0.0234674
GG 20	1	46.8276	44.8276	41.8462	44.5004	2.50678	1.44733	5.71439	a		MTD8	0.5	26.7928	33.4693	39.7379	43.2783	49.162	49.402	49.1625	53.1612		5	8	7		9	27	25.7778	1.22222	1.49383	0.0579502
MTD1	1	22.9167	22.7273	32.1429	25.9289	5.38225	3.10753		d			90	90	90	90	90	90	90	90	90		5	5	9			232				15.1121
MTD2	1	40.9091	38.0952	33.0769	37.3604	3.96745	2.29068		bc		LSD	0.130344	5.71439	8.68456	6.81331	9.41805	7.78659	7.51447	6.41663	7.55089		7	7	2							p=0.057004
MTD3	1	47.2727	45	51.0204	47.7644	3.04017	1.75529		a			0.0651719	2.85719	4.34228	3.40666	4.70902	3.89329	3.75724	3.20831	3.77545		9	1	1
MTD4	1	38.2979	38.4615	36.1111	37.6235	1.31233	0.757695		b													3	5	3
MTD5	1	35.2941	31.0345	29.0323	31.787	3.19803	1.84644		c													5	5	1
MTD6	1	29.7297	31.7073	21.9512	27.7961	5.15748	2.97776		cd													8	7	1
MTD7	1	27.78	29.6296	28.3333	28.581	0.949359	0.548129		cd													7	7	1
MTD8	1	27.2727	26.3158	26.79	26.7928	0.478475	0.276256		cd													8	6	3
GG 20	2	50.5517	46.5517	41.4615	46.1883	4.55598	2.63047		a													3	2	9
MTD1	2	31.25	35	32.8571	33.0357	1.88137	1.08624	8.68456	c													1	1	5
MTD2	2	45.4545	47.619	33.3333	42.1356	7.69946	4.44542		ab													5	5	9
MTD3	2	33.3333	40	49.1837	40.839	7.95841	4.59492		abc													5	6	3
MTD4	2	48.9362	44.2308	44.4444	45.8705	2.65713	1.53414		a													3	0	8
MTD5	2	43.1373	41.3793	35.4839	40.0001	4.00876	2.31453		abc													6	2	4
MTD6	2	37.8378	36.5854	34.1463	36.1898	1.87726	1.08387		bc													8	6	9
MTD7	2	47.8947	48.1481	35	43.681	7.519	4.34122		ab													8	5	6
MTD8	2	32.7273	34.2105	33.47	33.4693	0.741627	0.428191		c													2	1	5
GG 20	3	54.7241	51.7241	50.1538	52.2007	2.32212	1.34071	6.81331	ab													7	5	7
MTD1	3	37.5	36.3636	46.4286	40.0974	5.51231	3.18263		c													5	5	2
MTD2	3	47.7273	47.619	43.3333	46.2266	2.50618	1.44699		bc													5	4	4
MTD3	3	49.3939	47.5	59.1837	52.0259	6.27075	3.62053		ab													7	6	3
MTD4	3	53.1915	53.8462	61.1111	56.0496	4.39562	2.53788		a													4	5	8
MTD5	3	42.9412	44.8276	38.7097	42.1595	3.13297	1.80887		c													1	9	1
MTD6	3	40.5405	43.9024	36.5854	40.3428	3.66254	2.11463		c													2	5	8
MTD7	3	45.7895	45.5556	38.3333	43.2261	4.23889	2.4474		c													5	2	5
MTD8	3	40	39.4737	39.74	39.7379	0.263164	0.151942		c													5	6	3
GG 20	4	61.1724	55.1724	58.8462	58.397	3.02511	1.7466	9.41805	a													0	3	4
MTD1	4	43.75	36.3636	50	43.3712	6.82607	3.94115		c													4	4	9
MTD2	4	47.7273	47.619	33.3333	42.8932	8.27928	4.78018		c													5	4	0
MTD3	4	45.4545	50	61.2245	52.2263	8.11728	4.68665		abc													7	6	3
MTD4	4	55.3191	53.8462	61.1111	56.7588	3.84049	2.21737		ab													5	0	4
MTD5	4	52.9412	44.8276	48.3871	48.7186	4.06694	2.34812		bc													2	9	1
MTD6	4	45.9459	46.3415	48.7805	47.0226	1.53514	0.886339		c													2	5	5
MTD7	4	58.4211	66.6667	53.3333	59.4737	6.7287	3.88493		a													9	1	8
MTD8	4	41.8182	44.7368	43.28	43.2783	1.45933	0.84257		c													9	7	3
GG 20	5	65.3448	60.3448	64.6923	63.4607	2.71804	1.56931	7.78659	a													8	2	8
MTD1	5	45.8333	45.4545	53.5714	48.2864	4.58085	2.64484		c													9	9	7
MTD2	5	56.8182	57.1429	43.5897	52.5169	7.73287	4.46471		bc													3	5	6
MTD3	5	48.4848	55	63.2653	55.5834	7.40748	4.27684		bc													8	1	6
MTD4	5	55.3191	55.7692	61.1111	57.3998	3.22193	1.86024		ab													5	5	9
MTD5	5	54.902	51.7241	54.8387	53.8216	1.81673	1.04892		bc													2	8	1
MTD6	5	51.3514	51.2195	56.0976	52.8895	2.77907	1.60454		bc													7	5	4
MTD7	5	51.0526	56.6667	53.3333	53.6842	2.82342	1.63015		bc													3	9	8
MTD8	5	45.4545	52.6316	49.4	49.162	3.59443	2.07531		c													4	7	3
GG 20	6	70.7931	65.7931	71.3846	69.3236	3.07178	1.77354	7.51447	a													5	4	4
MTD1	6	50	45.4545	57.1429	50.8658	5.89206	3.40188		de													9	9	4
MTD2	6	56.8182	61.9048	58.7179	59.147	2.57028	1.484		bc													0	5	2
MTD3	6	61.5152	65	69.3878	65.301	3.94492	2.27767		ab													8	9	7
MTD4	6	59.5745	59.6154	61.1111	60.1003	0.875609	0.505548		bc													5	5	8
MTD5	6	62.7451	55.1724	58.0645	58.6607	3.82138	2.20634		bc													4	6	1
MTD6	6	51.3514	56.0976	56.0976	54.5155	2.74023	1.58212		cde													7	4	2
MTD7	6	56.8421	66.6667	50	57.8363	8.37769	4.837		bcd													3	8	8
MTD8	6	45.4545	52.6316	50.12	49.402	3.64198	2.10276		e													9	7	0
GG 20	7	72.7931	68.7931	75.2308	72.2723	3.25028	1.8766	6.41663	a													5	4	2
MTD1	7	52.0833	45.4545	57.1429	51.5602	5.86169	3.38435		de													9	9	2
MTD2	7	59.0909	61.9048	51.2821	57.4259	5.50361	3.1776		cd													3	5	2
MTD3	7	64.5455	65	69.3878	66.3111	2.67416	1.54397		ab													1	9	3
MTD4	7	63.8298	69.6154	72.2222	68.5558	4.29538	2.48001		a													6	5	8
MTD5	7	64.7059	58.6207	61.2903	61.539	3.05021	1.76109		bc													5	6	2
MTD6	7	59.4595	58.5366	58.5366	58.8442	0.532822	0.307634		c													2	4	2
MTD7	7	66.8421	70.3704	63.3333	66.8486	3.51852	2.03148		ab													5	7	7
MTD8	7	50.9091	47.3684	49.21	49.1625	1.77081	1.02241		e													9	4	3
GG 20	8	79.4138	75.4138	80.0769	78.3015	2.52271	1.45653	7.55089	a													9	6	1
MTD1	8	56.25	50	60.7143	55.6548	5.38189	3.10733		e													3	3	1
MTD2	8	59.0909	61.4286	51.2821	57.2672	5.31342	3.0678		d													5	0	7
MTD3	8	60.6061	70	69.3878	66.6646	5.25578	3.03451		bc													1	4	3
MTD4	8	63.8298	63.4615	75	67.4304	6.55801	3.78638		b													6	0	8
MTD5	8	60.5882	58.6207	61.2903	60.1664	1.3839	0.799019		bcde													5	5	5
MTD6	8	59.4595	65.8537	65.8537	63.7223	3.69169	2.13146		bcd													6	4	2
MTD7	8	56.8421	64.0741	58.3333	59.7498	3.8184	2.20462		cde													5	4	4
MTD8	8	56.3636	50	53.12	53.1612	3.18202	1.83719		e													9	1	3

## Sheet: Data for Fig 6
	Water Deficit Stress
Transgenic line	R1	R2	R3	Mean	sd	SE		lsd			Mean			1	4	6	-2	4	0.666667
MTD1	79.4979	79.2857	72.6852	77.1563	3.87353	2.23645	a	7.92176			Water Deficit Stress	Well Watered		2	9	6	3	9	1.5
MTD2	80.1205	76.4368	80.8271	79.1281	2.35738	1.36108	a			MTD1	77.1563	82.8674		3	7	6	1	1	0.166667
MTD3	78.1759	77.4468	81.23	78.9509	2.00714	1.15886	a			MTD2	79.1281	85.0096		4	3	6	-3	9	1.5
MTD4	76.25	74.89	80.28	77.14	2.80305	1.61839	a			MTD3	78.9509	82.2759		5	5	6	-1	1	0.166667
MTD5	70.2381	74.2754	77.32	73.9445	3.55253	2.05111	a			MTD4	77.14	83.2067		6	6	6	0	0	0
MTD6	69.87	73.46	76.39	73.24	3.26556	1.88543	a			MTD5	73.9445	79.6966		7	3	6	-3	9	1.5
MTD7	64.7343	68.29	60.78	64.6014	3.75676	2.16903	b			MTD6	73.24	81.0633		8	9	6	3	9	1.5
MTD8	77.25	73.21	80.11	76.8567	3.46678	2.0016	a			MTD7	64.6014	76.3982		9	8	6	2	4	0.666667
GG-20 (WT)	59.292	38.3117	49.28	48.9612	10.4938	6.05878	c			MTD8	76.8567	82.2533			54				7.66667
										WT	48.9612	70.5228							p=0.466676
											100	100		8	3	2
	Well watered									LSD	7.92176	5.73495		8	4	9
Transgenic line	R1	R2	R3	Mean				LSD		LSD/2	3.96088	2.86747		3	3	3
MTD1	84.6154	85.3503	78.6364	82.8674	3.68253	2.12617	a	5.73495						5	9	8
MTD2	86.3309	82.0312	86.6667	85.0096	2.5848	1.49238	a				Water Deficit Stress	Well Watered	SE	2	6	2
MTD3	81.6568	81.1458	84.025	82.2759	1.5362	0.886954	a			MTD1	2.23645	2.12617		7	6	9
MTD4	85.52	80.92	83.18	83.2067	2.30012	1.32801	a			MTD2	1.36108	1.49238		2	9	8
MTD5	78.3582	86.3415	74.39	79.6966	6.0871	3.51449	a			MTD3	1.15886	0.886954		5	1	1
MTD6	81.03	77.32	84.84	81.0633	3.76011	2.17096	ab			MTD4	1.61839	1.32801		1	3	8
MTD7	76.7045	72.92	79.57	76.3982	3.33557	1.92585	b			MTD5	2.05111	3.51449
MTD8	84.59	82.19	79.98	82.2533	2.30565	1.33121	a			MTD6	1.88543	2.17096
GG-20 (WT)	70.5036	72.7848	68.28	70.5228	2.25247	1.3005	c			MTD7	2.16903	1.92585
										MTD8	2.0016	1.33121
										GG-20 (WT)	6.05878	1.3005		6	6	6
														6	5	7
														8	4	5
														2	2	8
														9	1	9
														3	2	4
														5	2	7
														9	9	8
														2	3	8
